# Supplementary material for: Mediator Effects of Cognitive Load on Association between Self-Efficacy and Task Load in Intensive Care Unit Nurses
Source: Hindawi journal article supplement (doi:10.1155/2024/5562751), 2024-02-02
Supplement: f1 [file 5562751.f1.pdf]

| Number | Age   | ICU<br>experience<br>(years) | Professional<br>Title | Gender | Ethnicity | Marital<br>status | Education<br>level | ICU<br>specialty<br>nurse |
|--------|-------|------------------------------|-----------------------|--------|-----------|-------------------|--------------------|---------------------------|
| 1      | 42.00 | 23                           | 3                     | 2      | 1         | 1                 | 3                  | 1                         |
| 2      | 35.00 | 11                           | 3                     | 2      | 1         | 2                 | 3                  | 2                         |
| 3      | 29.00 | 9                            | 2                     | 2      | 1         | 2                 | 3                  | 2                         |
| 4      | 29.00 | 6                            | 2                     | 2      | 1         | 2                 | 3                  | 2                         |
| 5      | 39.00 | 11                           | 3                     | 1      | 1         | 1                 | 2                  | 2                         |
| 6      | 36.00 | 10                           | 3                     | 1      | 1         | 1                 | 2                  | 2                         |
| 7      | 31.00 | 9                            | 2                     | 1      | 1         | 2                 | 3                  | 2                         |
| 8      | 38.00 | 16                           | 3                     | 1      | 1         | 1                 | 3                  | 1                         |
| 9      | 31.00 | 9                            | 3                     | 1      | 1         | 1                 | 3                  | 1                         |
| 10     | 33.00 | 8                            | 2                     | 1      | 1         | 1                 | 3                  | 1                         |
| 11     | 36.00 | 14                           | 3                     | 1      | 1         | 1                 | 2                  | 2                         |
| 12     | 31.00 | 12                           | 2                     | 1      | 1         | 1                 | 2                  | 2                         |
| 13     | 34.00 | 10                           | 3                     | 2      | 1         | 1                 | 3                  | 2                         |
| 14     | 23.00 | 1                            | 1                     | 1      | 6         | 2                 | 3                  | 2                         |
| 15     | 34.00 | 7                            | 2                     | 1      | 1         | 1                 | 2                  | 1                         |
| 16     | 33.00 | 9                            | 2                     | 1      | 1         | 1                 | 3                  | 2                         |
| 17     | 32.00 | 10                           | 2                     | 1      | 2         | 1                 | 2                  | 2                         |
| 18     | 35.00 | 14                           | 3                     | 1      | 1         | 1                 | 3                  | 2                         |
| 19     | 27.00 | 5                            | 2                     | 1      | 1         | 2                 | 3                  | 1                         |
| 20     | 37.00 | 15                           | 3                     | 1      | 1         | 1                 | 3                  | 2                         |
| 21     | 24.00 | 2                            | 1                     | 1      | 2         | 2                 | 3                  | 2                         |
| 22     | 37.00 | 11                           | 3                     | 2      | 1         | 1                 | 3                  | 1                         |
| 23     | 37.00 | 13                           | 3                     | 2      | 1         | 1                 | 3                  | 2                         |
| 24     | 32.00 | 7                            | 3                     | 2      | 1         | 2                 | 3                  | 2                         |
| 25     | 34.00 | 8                            | 3                     | 2      | 1         | 1                 | 3                  | 1                         |
| 26     | 39.00 | 17                           | 3                     | 2      | 1         | 1                 | 2                  | 2                         |
| 27     | 39.00 | 17                           | 3                     | 2      | 1         | 1                 | 2                  | 2                         |
| 28     | 38.00 | 14                           | 3                     | 2      | 1         | 1                 | 2                  | 2                         |
| 29     | 38.00 | 12                           | 3                     | 2      | 1         | 1                 | 3                  | 2                         |
| 30     | 38.00 | 16                           | 3                     | 1      | 1         | 3                 | 3                  | 2                         |
| 31     | 39.00 | 16                           | 3                     | 2      | 1         | 1                 | 3                  | 1                         |
| 32     | 38.00 | 11                           | 3                     | 2      | 1         | 1                 | 3                  | 2                         |
| 33     | 41.00 | 19                           | 3                     | 2      | 1         | 1                 | 3                  | 2                         |
| 34     | 34.00 | 12                           | 3                     | 2      | 1         | 1                 | 2                  | 1                         |
| 35     | 41.00 | 18                           | 3                     | 2      | 1         | 1                 | 3                  | 1                         |
| 36     | 40.00 | 14                           | 3                     | 1      | 1         | 1                 | 3                  | 1                         |
| 37     | 34.00 | 10                           | 3                     | 2      | 6         | 1                 | 2                  | 2                         |
| 38     | 26.00 | 4                            | 1                     | 2      | 1         | 2                 | 3                  | 1                         |
| 39     | 34.00 | 12                           | 3                     | 2      | 1         | 1                 | 2                  | 2                         |
| 40     | 25.00 | 3                            | 1                     | 2      | 1         | 2                 | 2                  | 2                         |
| 41     | 32.00 | 7                            | 3                     | 2      | 1         | 1                 | 2                  | 2                         |
| 42     | 32.00 | 6                            | 3                     | 2      | 1         | 1                 | 2                  | 1                         |
| 43     | 38.00 | 10                           | 3                     | 2      | 1         | 1                 | 3                  | 2                         |
| 44     | 36.00 | 15                           | 3                     | 2      | 1         | 1                 | 3                  | 2                         |
| 45     | 26.00 | 4                            | 1                     | 2      | 1         | 2                 | 3                  | 1                         |
| 46     | 31.00 | 9                            | 3                     | 2      | 1         | 2                 | 3                  | 2                         |
| 47     | 31.00 | 9                            | 2                     | 1      | 1         | 1                 | 3                  | 2                         |
| 48     | 36.00 | 12                           | 3                     | 2      | 1         | 1                 | 3                  | 1                         |
| 49     | 38.00 | 16                           | 3                     | 2      | 1         | 1                 | 3                  | 2                         |
| 50     | 32.00 | 9                            | 2                     | 2      | 1         | 1                 | 3                  | 2                         |

|     |       |    |   |   |   |   |   |   |
|-----|-------|----|---|---|---|---|---|---|
| 51  | 38.00 | 14 | 3 | 2 | 1 | 3 | 3 | 1 |
| 52  | 31.00 | 9  | 2 | 2 | 1 | 2 | 3 | 2 |
| 53  | 27.00 | 5  | 2 | 2 | 1 | 2 | 3 | 1 |
| 54  | 28.00 | 5  | 2 | 2 | 1 | 2 | 3 | 2 |
| 55  | 32.00 | 9  | 2 | 2 | 1 | 1 | 3 | 2 |
| 56  | 41.00 | 9  | 3 | 2 | 1 | 1 | 3 | 1 |
| 57  | 37.00 | 15 | 3 | 2 | 1 | 1 | 3 | 1 |
| 58  | 32.00 | 6  | 2 | 2 | 1 | 1 | 2 | 1 |
| 59  | 37.00 | 15 | 3 | 2 | 1 | 1 | 3 | 2 |
| 60  | 30.00 | 8  | 2 | 2 | 1 | 3 | 3 | 2 |
| 61  | 32.00 | 8  | 2 | 2 | 1 | 1 | 3 | 1 |
| 62  | 32.00 | 12 | 2 | 2 | 1 | 2 | 3 | 2 |
| 63  | 49.00 | 20 | 3 | 2 | 1 | 1 | 2 | 2 |
| 64  | 31.00 | 8  | 3 | 1 | 1 | 1 | 3 | 1 |
| 65  | 32.00 | 12 | 2 | 2 | 1 | 1 | 3 | 2 |
| 66  | 39.00 | 13 | 3 | 2 | 1 | 1 | 2 | 1 |
| 67  | 26.00 | 4  | 2 | 2 | 1 | 2 | 3 | 1 |
| 68  | 21.00 | 1  | 1 | 1 | 1 | 2 | 2 | 1 |
| 69  | 30.00 | 8  | 2 | 2 | 1 | 2 | 3 | 1 |
| 70  | 32.00 | 7  | 3 | 2 | 1 | 3 | 3 | 2 |
| 71  | 29.00 | 7  | 2 | 2 | 1 | 2 | 3 | 2 |
| 72  | 28.00 | 4  | 2 | 2 | 1 | 2 | 2 | 1 |
| 73  | 41.00 | 14 | 3 | 2 | 1 | 1 | 3 | 2 |
| 74  | 30.00 | 8  | 2 | 2 | 1 | 2 | 3 | 1 |
| 75  | 24.00 | 2  | 2 | 2 | 1 | 2 | 2 | 1 |
| 76  | 33.00 | 10 | 2 | 2 | 1 | 1 | 3 | 1 |
| 77  | 37.00 | 12 | 3 | 1 | 1 | 1 | 2 | 2 |
| 78  | 35.00 | 13 | 3 | 2 | 1 | 1 | 3 | 2 |
| 79  | 25.00 | 1  | 2 | 2 | 1 | 2 | 3 | 2 |
| 80  | 32.00 | 10 | 3 | 2 | 1 | 1 | 3 | 1 |
| 81  | 36.00 | 16 | 3 | 2 | 1 | 1 | 3 | 2 |
| 82  | 35.00 | 16 | 3 | 1 | 1 | 1 | 3 | 1 |
| 83  | 32.00 | 6  | 2 | 2 | 1 | 1 | 2 | 1 |
| 84  | 33.00 | 7  | 2 | 2 | 1 | 1 | 3 | 2 |
| 85  | 37.00 | 11 | 3 | 1 | 1 | 1 | 3 | 2 |
| 86  | 28.00 | 6  | 2 | 2 | 1 | 2 | 2 | 2 |
| 87  | 49.00 | 16 | 3 | 2 | 1 | 1 | 3 | 2 |
| 88  | 32.00 | 12 | 2 | 2 | 1 | 1 | 3 | 2 |
| 89  | 36.00 | 16 | 2 | 2 | 1 | 1 | 2 | 2 |
| 90  | 32.00 | 14 | 3 | 1 | 1 | 1 | 3 | 1 |
| 91  | 31.00 | 7  | 2 | 2 | 1 | 1 | 2 | 2 |
| 92  | 31.00 | 9  | 3 | 2 | 1 | 1 | 2 | 2 |
| 93  | 26.00 | 4  | 1 | 2 | 1 | 2 | 3 | 1 |
| 94  | 31.00 | 7  | 2 | 2 | 1 | 2 | 3 | 2 |
| 95  | 32.00 | 12 | 2 | 2 | 1 | 1 | 2 | 1 |
| 96  | 29.00 | 6  | 2 | 2 | 1 | 2 | 3 | 1 |
| 97  | 35.00 | 13 | 2 | 2 | 1 | 1 | 2 | 2 |
| 98  | 33.00 | 12 | 2 | 2 | 1 | 1 | 3 | 1 |
| 99  | 51.00 | 12 | 3 | 1 | 1 | 1 | 3 | 1 |
| 100 | 27.00 | 5  | 1 | 2 | 1 | 2 | 2 | 2 |
| 101 | 35.00 | 13 | 3 | 2 | 1 | 2 | 3 | 2 |
| 102 | 32.00 | 7  | 2 | 2 | 1 | 1 | 2 | 2 |
| 103 | 41.00 | 16 | 3 | 2 | 1 | 1 | 2 | 2 |
| 104 | 27.00 | 4  | 2 | 1 | 1 | 2 | 3 | 1 |

|     |       |    |   |   |   |   |   |   |
|-----|-------|----|---|---|---|---|---|---|
| 105 | 30.00 | 8  | 2 | 1 | 1 | 2 | 3 | 2 |
| 106 | 49.00 | 15 | 3 | 1 | 1 | 1 | 3 | 1 |
| 107 | 35.00 | 12 | 3 | 2 | 1 | 1 | 3 | 1 |
| 108 | 31.00 | 9  | 2 | 2 | 1 | 2 | 3 | 2 |
| 109 | 37.00 | 11 | 3 | 1 | 1 | 1 | 3 | 1 |
| 110 | 41.00 | 12 | 3 | 1 | 1 | 1 | 3 | 2 |
| 111 | 24.00 | 2  | 1 | 1 | 1 | 2 | 3 | 2 |
| 112 | 25.00 | 4  | 1 | 1 | 1 | 1 | 2 | 2 |
| 113 | 32.00 | 11 | 2 | 2 | 1 | 1 | 3 | 1 |
| 114 | 23.00 | 1  | 1 | 1 | 6 | 1 | 2 | 1 |
| 115 | 23.00 | 1  | 1 | 1 | 1 | 2 | 3 | 2 |
| 116 | 41.00 | 12 | 3 | 1 | 1 | 1 | 3 | 2 |
| 117 | 51.00 | 13 | 3 | 1 | 1 | 1 | 3 | 1 |
| 118 | 23.00 | 1  | 1 | 1 | 1 | 2 | 3 | 2 |
| 119 | 31.00 | 6  | 2 | 1 | 1 | 1 | 2 | 1 |
| 120 | 29.00 | 7  | 2 | 2 | 1 | 2 | 3 | 1 |
| 121 | 36.00 | 16 | 2 | 2 | 1 | 1 | 3 | 2 |
| 122 | 23.00 | 1  | 1 | 2 | 2 | 2 | 3 | 1 |
| 123 | 31.00 | 7  | 3 | 2 | 1 | 1 | 3 | 1 |
| 124 | 32.00 | 11 | 3 | 2 | 1 | 1 | 3 | 2 |
| 125 | 38.00 | 16 | 3 | 2 | 1 | 1 | 3 | 1 |
| 126 | 30.00 | 7  | 2 | 2 | 1 | 2 | 3 | 1 |
| 127 | 35.00 | 16 | 3 | 2 | 1 | 1 | 3 | 2 |
| 128 | 50.00 | 18 | 3 | 2 | 1 | 1 | 2 | 2 |
| 129 | 30.00 | 7  | 2 | 2 | 1 | 2 | 3 | 2 |
| 130 | 51.00 | 11 | 3 | 1 | 1 | 1 | 3 | 2 |
| 131 | 38.00 | 16 | 3 | 2 | 1 | 1 | 3 | 2 |
| 132 | 32.00 | 12 | 2 | 1 | 1 | 2 | 3 | 2 |
| 133 | 25.00 | 3  | 1 | 1 | 1 | 2 | 3 | 2 |
| 134 | 33.00 | 9  | 3 | 1 | 1 | 1 | 3 | 1 |
| 135 | 30.00 | 9  | 2 | 1 | 1 | 2 | 2 | 1 |
| 136 | 40.00 | 11 | 3 | 2 | 1 | 1 | 3 | 2 |
| 137 | 35.00 | 9  | 3 | 2 | 1 | 1 | 3 | 1 |
| 138 | 35.00 | 12 | 3 | 1 | 2 | 1 | 3 | 1 |
| 139 | 34.00 | 10 | 2 | 2 | 1 | 1 | 2 | 2 |
| 140 | 30.00 | 8  | 2 | 2 | 1 | 2 | 3 | 1 |
| 141 | 33.00 | 11 | 2 | 2 | 1 | 1 | 3 | 1 |
| 142 | 31.00 | 9  | 2 | 1 | 1 | 1 | 2 | 2 |
| 143 | 31.00 | 6  | 2 | 1 | 1 | 2 | 3 | 1 |
| 144 | 32.00 | 12 | 2 | 1 | 1 | 1 | 2 | 2 |
| 145 | 23.00 | 1  | 1 | 2 | 2 | 2 | 3 | 1 |
| 146 | 30.00 | 7  | 2 | 1 | 1 | 2 | 2 | 2 |
| 147 | 23.00 | 1  | 1 | 2 | 1 | 2 | 2 | 1 |
| 148 | 23.00 | 1  | 1 | 2 | 1 | 2 | 2 | 1 |
| 149 | 24.00 | 2  | 1 | 2 | 1 | 2 | 2 | 2 |
| 150 | 24.00 | 2  | 1 | 2 | 1 | 2 | 3 | 2 |
| 151 | 24.00 | 2  | 1 | 2 | 6 | 2 | 3 | 2 |
| 152 | 24.00 | 2  | 1 | 2 | 1 | 2 | 3 | 1 |
| 153 | 25.00 | 3  | 1 | 2 | 1 | 2 | 3 | 2 |
| 154 | 24.00 | 2  | 2 | 2 | 1 | 2 | 3 | 1 |
| 155 | 31.00 | 10 | 2 | 2 | 1 | 1 | 3 | 1 |
| 156 | 32.00 | 12 | 2 | 2 | 1 | 1 | 2 | 2 |
| 157 | 33.00 | 14 | 2 | 2 | 2 | 1 | 3 | 1 |
| 158 | 32.00 | 6  | 2 | 2 | 1 | 1 | 2 | 2 |

|     |       |    |   |   |   |   |   |   |
|-----|-------|----|---|---|---|---|---|---|
| 159 | 32.00 | 7  | 2 | 2 | 1 | 1 | 3 | 2 |
| 160 | 32.00 | 8  | 2 | 2 | 1 | 1 | 2 | 2 |
| 161 | 32.00 | 9  | 2 | 2 | 1 | 1 | 3 | 2 |
| 162 | 36.00 | 14 | 3 | 1 | 1 | 1 | 2 | 2 |
| 163 | 40.00 | 18 | 3 | 1 | 1 | 1 | 3 | 2 |
| 164 | 32.00 | 12 | 3 | 1 | 1 | 1 | 2 | 1 |
| 165 | 33.00 | 6  | 3 | 1 | 1 | 1 | 3 | 2 |
| 166 | 25.00 | 3  | 1 | 1 | 1 | 2 | 2 | 2 |
| 167 | 26.00 | 4  | 1 | 1 | 1 | 2 | 3 | 1 |
| 168 | 21.00 | 3  | 1 | 2 | 1 | 2 | 2 | 1 |
| 169 | 28.00 | 6  | 2 | 1 | 1 | 2 | 3 | 2 |
| 170 | 30.00 | 12 | 2 | 1 | 1 | 2 | 3 | 2 |
| 171 | 30.00 | 7  | 2 | 1 | 1 | 2 | 3 | 1 |
| 172 | 30.00 | 7  | 2 | 1 | 1 | 2 | 3 | 1 |
| 173 | 30.00 | 7  | 1 | 1 | 2 | 1 | 2 | 2 |
| 174 | 32.00 | 11 | 3 | 2 | 6 | 1 | 3 | 1 |
| 175 | 34.00 | 10 | 2 | 1 | 1 | 1 | 2 | 2 |
| 176 | 31.00 | 9  | 3 | 2 | 1 | 2 | 3 | 2 |
| 177 | 21.00 | 1  | 3 | 2 | 1 | 1 | 3 | 1 |
| 178 | 38.00 | 15 | 3 | 1 | 1 | 1 | 2 | 1 |
| 179 | 33.00 | 10 | 2 | 1 | 6 | 1 | 2 | 1 |
| 180 | 35.00 | 12 | 3 | 1 | 1 | 3 | 3 | 2 |
| 181 | 39.00 | 15 | 3 | 1 | 1 | 1 | 3 | 2 |
| 182 | 42.00 | 23 | 2 | 2 | 1 | 1 | 3 | 2 |
| 183 | 52.00 | 29 | 3 | 2 | 1 | 1 | 2 | 2 |
| 184 | 46.00 | 25 | 3 | 2 | 1 | 1 | 3 | 1 |
| 185 | 39.00 | 17 | 3 | 2 | 1 | 1 | 3 | 1 |
| 186 | 33.00 | 10 | 2 | 2 | 1 | 1 | 3 | 2 |
| 187 | 38.00 | 16 | 3 | 1 | 1 | 1 | 3 | 1 |
| 188 | 25.00 | 3  | 1 | 1 | 1 | 2 | 3 | 1 |
| 189 | 21.00 | 1  | 2 | 2 | 1 | 2 | 3 | 2 |
| 190 | 33.00 | 11 | 2 | 2 | 1 | 2 | 2 | 2 |
| 191 | 23.00 | 10 | 1 | 1 | 1 | 2 | 2 | 2 |
| 192 | 32.00 | 9  | 2 | 2 | 1 | 1 | 3 | 1 |
| 193 | 27.00 | 2  | 1 | 1 | 1 | 1 | 2 | 2 |
| 194 | 31.00 | 7  | 2 | 2 | 1 | 1 | 3 | 2 |
| 195 | 27.00 | 4  | 2 | 1 | 1 | 2 | 3 | 1 |
| 196 | 39.00 | 17 | 3 | 1 | 1 | 1 | 3 | 2 |
| 197 | 33.00 | 11 | 3 | 2 | 1 | 1 | 3 | 2 |
| 198 | 31.00 | 9  | 3 | 2 | 1 | 2 | 3 | 2 |
| 199 | 31.00 | 10 | 2 | 2 | 1 | 2 | 3 | 2 |
| 200 | 37.00 | 16 | 3 | 1 | 1 | 1 | 3 | 2 |
| 201 | 31.00 | 9  | 2 | 2 | 1 | 1 | 3 | 2 |
| 202 | 34.00 | 10 | 3 | 2 | 1 | 1 | 2 | 2 |
| 203 | 33.00 | 8  | 2 | 2 | 1 | 2 | 3 | 2 |
| 204 | 47.00 | 28 | 3 | 2 | 1 | 1 | 3 | 1 |
| 205 | 49.00 | 29 | 3 | 2 | 1 | 1 | 2 | 2 |
| 206 | 35.00 | 12 | 3 | 2 | 1 | 1 | 3 | 1 |
| 207 | 26.00 | 3  | 1 | 1 | 1 | 2 | 2 | 2 |
| 208 | 26.00 | 4  | 2 | 1 | 1 | 2 | 2 | 1 |
| 209 | 28.00 | 3  | 2 | 1 | 1 | 1 | 3 | 2 |
| 210 | 32.00 | 12 | 3 | 2 | 1 | 1 | 3 | 1 |
| 211 | 35.00 | 13 | 3 | 1 | 1 | 3 | 3 | 2 |
| 212 | 31.00 | 7  | 2 | 2 | 1 | 1 | 3 | 2 |

|     |       |    |   |   |   |   |   |   |
|-----|-------|----|---|---|---|---|---|---|
| 213 | 33.00 | 11 | 2 | 2 | 1 | 2 | 3 | 1 |
| 214 | 21.00 | 1  | 1 | 1 | 1 | 2 | 2 | 1 |
| 215 | 29.00 | 9  | 2 | 2 | 1 | 2 | 3 | 2 |
| 216 | 32.00 | 10 | 2 | 2 | 1 | 1 | 2 | 2 |
| 217 | 32.00 | 9  | 2 | 2 | 1 | 1 | 3 | 1 |
| 218 | 28.00 | 5  | 1 | 2 | 1 | 1 | 2 | 2 |
| 219 | 32.00 | 8  | 2 | 2 | 1 | 1 | 3 | 2 |
| 220 | 26.00 | 4  | 1 | 1 | 1 | 1 | 2 | 2 |
| 221 | 25.00 | 4  | 3 | 2 | 1 | 1 | 3 | 2 |
| 222 | 34.00 | 13 | 3 | 2 | 1 | 1 | 3 | 1 |
| 223 | 32.00 | 10 | 3 | 2 | 1 | 1 | 3 | 1 |
| 224 | 26.00 | 2  | 2 | 2 | 1 | 2 | 3 | 2 |
| 225 | 31.00 | 8  | 2 | 2 | 1 | 1 | 3 | 1 |
| 226 | 38.00 | 16 | 3 | 1 | 1 | 1 | 3 | 1 |
| 227 | 34.00 | 10 | 2 | 1 | 1 | 1 | 2 | 1 |
| 228 | 36.00 | 16 | 3 | 1 | 1 | 1 | 3 | 1 |
| 229 | 38.00 | 16 | 3 | 1 | 1 | 3 | 3 | 2 |
| 230 | 32.00 | 12 | 2 | 1 | 1 | 1 | 3 | 1 |
| 231 | 51.00 | 16 | 3 | 2 | 1 | 1 | 3 | 1 |
| 232 | 33.00 | 14 | 2 | 2 | 1 | 1 | 3 | 2 |
| 233 | 40.00 | 12 | 3 | 2 | 1 | 1 | 3 | 1 |
| 234 | 41.00 | 16 | 3 | 2 | 1 | 1 | 3 | 2 |
| 235 | 25.00 | 3  | 1 | 2 | 1 | 2 | 2 | 2 |
| 236 | 33.00 | 13 | 3 | 2 | 6 | 1 | 3 | 2 |
| 237 | 31.00 | 12 | 2 | 2 | 1 | 1 | 2 | 2 |
| 238 | 51.00 | 14 | 3 | 2 | 1 | 1 | 2 | 2 |
| 239 | 33.00 | 10 | 3 | 2 | 1 | 1 | 3 | 1 |
| 240 | 33.00 | 11 | 3 | 2 | 1 | 1 | 3 | 2 |
| 241 | 37.00 | 11 | 3 | 2 | 1 | 1 | 3 | 2 |
| 242 | 32.00 | 9  | 3 | 2 | 1 | 1 | 2 | 1 |
| 243 | 28.00 | 6  | 2 | 2 | 1 | 2 | 3 | 2 |
| 244 | 26.00 | 4  | 1 | 2 | 1 | 2 | 3 | 1 |
| 245 | 32.00 | 7  | 3 | 2 | 1 | 1 | 2 | 2 |
| 246 | 30.00 | 11 | 2 | 2 | 1 | 2 | 3 | 1 |
| 247 | 51.00 | 16 | 3 | 1 | 1 | 1 | 3 | 2 |
| 248 | 30.00 | 8  | 2 | 1 | 1 | 2 | 3 | 1 |
| 249 | 27.00 | 5  | 1 | 1 | 1 | 2 | 3 | 2 |
| 250 | 40.00 | 15 | 3 | 1 | 1 | 1 | 3 | 1 |
| 251 | 37.00 | 16 | 3 | 1 | 1 | 1 | 2 | 2 |
| 252 | 30.00 | 12 | 2 | 2 | 1 | 2 | 3 | 2 |
| 253 | 31.00 | 9  | 2 | 2 | 1 | 1 | 3 | 2 |

| Living situation | Average overtime hours per week | Working night shifts | Number of night shifts per month | Number of patients cared for during the day shift | Number of patients cared for during the night shift | SE1 | SE2 | SE3 |
|------------------|---------------------------------|----------------------|----------------------------------|---------------------------------------------------|-----------------------------------------------------|-----|-----|-----|
| 1                | 5                               | 2                    | 0                                | 2                                                 | 0                                                   | 2   | 2   | 2   |
| 1                | 2                               | 1                    | 7                                | 2                                                 | 2                                                   | 3   | 1   | 3   |
| 3                | 4                               | 1                    | 8                                | 2                                                 | 2                                                   | 2   | 2   | 1   |
| 3                | 4                               | 1                    | 8                                | 2                                                 | 2                                                   | 2   | 2   | 1   |
| 1                | 2                               | 1                    | 0                                | 2                                                 | 2                                                   | 2   | 2   | 1   |
| 1                | 2                               | 1                    | 0                                | 2                                                 | 2                                                   | 2   | 2   | 1   |
| 1                | 3                               | 1                    | 8                                | 2                                                 | 2                                                   | 2   | 2   | 1   |
| 1                | 2                               | 1                    | 0                                | 2                                                 | 2                                                   | 2   | 2   | 1   |
| 1                | 4                               | 1                    | 8                                | 2                                                 | 2                                                   | 2   | 2   | 2   |
| 1                | 4                               | 1                    | 8                                | 2                                                 | 2                                                   | 2   | 2   | 2   |
| 1                | 3                               | 1                    | 8                                | 2                                                 | 2                                                   | 2   | 2   | 2   |
| 1                | 1                               | 1                    | 8                                | 2                                                 | 2                                                   | 2   | 2   | 2   |
| 1                | 2                               | 1                    | 7                                | 2                                                 | 2                                                   | 3   | 2   | 3   |
| 2                | 2                               | 1                    | 7                                | 2                                                 | 2                                                   | 2   | 2   | 2   |
| 1                | 4                               | 1                    | 8                                | 2                                                 | 2                                                   | 2   | 2   | 2   |
| 1                | 4                               | 1                    | 8                                | 2                                                 | 2                                                   | 2   | 2   | 2   |
| 1                | 4                               | 1                    | 8                                | 2                                                 | 2                                                   | 2   | 2   | 2   |
| 1                | 4                               | 1                    | 8                                | 2                                                 | 2                                                   | 2   | 2   | 2   |
| 1                | 4                               | 1                    | 8                                | 2                                                 | 2                                                   | 2   | 2   | 2   |
| 3                | 2                               | 1                    | 9                                | 2                                                 | 2                                                   | 2   | 2   | 2   |
| 1                | 2                               | 2                    | 0                                | 2                                                 | 2                                                   | 2   | 2   | 3   |
| 1                | 2                               | 1                    | 7                                | 2                                                 | 2                                                   | 2   | 2   | 3   |
| 1                | 3                               | 1                    | 8                                | 2                                                 | 2                                                   | 2   | 3   | 1   |
| 1                | 3                               | 1                    | 8                                | 2                                                 | 2                                                   | 2   | 3   | 1   |
| 1                | 3                               | 1                    | 8                                | 2                                                 | 2                                                   | 2   | 2   | 2   |
| 1                | 3                               | 1                    | 8                                | 2                                                 | 2                                                   | 2   | 3   | 2   |
| 1                | 3                               | 1                    | 8                                | 2                                                 | 2                                                   | 2   | 3   | 2   |
| 1                | 3                               | 1                    | 8                                | 2                                                 | 2                                                   | 2   | 3   | 2   |
| 1                | 3                               | 1                    | 8                                | 2                                                 | 2                                                   | 2   | 3   | 2   |
| 1                | 3                               | 1                    | 8                                | 2                                                 | 2                                                   | 2   | 3   | 2   |
| 2                | 4                               | 1                    | 8                                | 4                                                 | 3                                                   | 2   | 3   | 2   |
| 1                | 3                               | 1                    | 8                                | 2                                                 | 2                                                   | 2   | 3   | 2   |
| 1                | 3                               | 1                    | 8                                | 2                                                 | 2                                                   | 2   | 3   | 2   |
| 1                | 2                               | 2                    | 6                                | 2                                                 | 2                                                   | 2   | 3   | 2   |
| 1                | 2                               | 1                    | 0                                | 2                                                 | 2                                                   | 2   | 3   | 3   |
| 1                | 4                               | 2                    | 0                                | 2                                                 | 0                                                   | 3   | 1   | 2   |
| 1                | 2                               | 1                    | 0                                | 3                                                 | 3                                                   | 2   | 3   | 3   |
| 1                | 3                               | 1                    | 8                                | 2                                                 | 2                                                   | 2   | 4   | 1   |
| 1                | 1                               | 1                    | 10                               | 2                                                 | 2                                                   | 2   | 4   | 2   |
| 1                | 1                               | 1                    | 10                               | 2                                                 | 2                                                   | 2   | 4   | 2   |
| 1                | 1                               | 1                    | 10                               | 2                                                 | 2                                                   | 2   | 4   | 2   |
| 1                | 3                               | 1                    | 8                                | 2                                                 | 2                                                   | 2   | 4   | 2   |
| 1                | 1                               | 1                    | 9                                | 2                                                 | 2                                                   | 2   | 4   | 3   |
| 1                | 3                               | 1                    | 8                                | 2                                                 | 2                                                   | 3   | 1   | 2   |
| 1                | 3                               | 1                    | 8                                | 2                                                 | 2                                                   | 3   | 1   | 3   |
| 1                | 1                               | 1                    | 10                               | 2                                                 | 2                                                   | 3   | 1   | 3   |
| 1                | 4                               | 1                    | 8                                | 2                                                 | 2                                                   | 4   | 2   | 3   |
| 1                | 3                               | 1                    | 8                                | 2                                                 | 2                                                   | 3   | 2   | 1   |
| 1                | 3                               | 1                    | 8                                | 2                                                 | 2                                                   | 3   | 2   | 1   |
| 1                | 3                               | 1                    | 8                                | 2                                                 | 2                                                   | 3   | 2   | 1   |
| 1                | 4                               | 1                    | 8                                | 2                                                 | 2                                                   | 3   | 2   | 1   |

|   |   |   |    |   |   |   |   |   |
|---|---|---|----|---|---|---|---|---|
| 2 | 4 | 1 | 8  | 2 | 2 | 3 | 2 | 2 |
| 1 | 3 | 1 | 8  | 2 | 2 | 3 | 2 | 2 |
| 3 | 4 | 1 | 8  | 2 | 2 | 3 | 2 | 2 |
| 3 | 4 | 1 | 8  | 2 | 2 | 3 | 2 | 2 |
| 1 | 4 | 1 | 8  | 2 | 2 | 3 | 2 | 3 |
| 1 | 2 | 2 | 11 | 2 | 2 | 3 | 2 | 3 |
| 1 | 3 | 1 | 9  | 2 | 2 | 2 | 2 | 1 |
| 1 | 4 | 1 | 8  | 2 | 2 | 3 | 2 | 3 |
| 1 | 5 | 1 | 11 | 2 | 2 | 3 | 2 | 4 |
| 2 | 2 | 1 | 9  | 2 | 2 | 3 | 3 | 1 |
| 1 | 4 | 1 | 8  | 2 | 2 | 3 | 3 | 1 |
| 2 | 2 | 1 | 9  | 2 | 2 | 3 | 3 | 1 |
| 1 | 2 | 2 | 2  | 2 | 2 | 3 | 3 | 2 |
| 1 | 4 | 1 | 8  | 3 | 2 | 3 | 3 | 2 |
| 1 | 4 | 1 | 8  | 2 | 2 | 3 | 3 | 2 |
| 1 | 3 | 2 | 2  | 2 | 2 | 3 | 3 | 2 |
| 3 | 2 | 1 | 9  | 2 | 2 | 3 | 3 | 2 |
| 3 | 2 | 1 | 6  | 1 | 1 | 3 | 3 | 3 |
| 3 | 2 | 1 | 9  | 2 | 2 | 3 | 3 | 2 |
| 1 | 1 | 1 | 9  | 2 | 2 | 3 | 3 | 2 |
| 3 | 4 | 1 | 8  | 2 | 2 | 3 | 3 | 2 |
| 3 | 4 | 1 | 8  | 2 | 2 | 3 | 3 | 2 |
| 1 | 2 | 2 | 0  | 2 | 2 | 3 | 3 | 2 |
| 2 | 2 | 1 | 9  | 2 | 2 | 3 | 3 | 3 |
| 1 | 2 | 1 | 7  | 2 | 2 | 3 | 3 | 3 |
| 1 | 4 | 1 | 8  | 2 | 2 | 3 | 3 | 3 |
| 1 | 5 | 1 | 8  | 4 | 2 | 3 | 3 | 3 |
| 1 | 5 | 1 | 11 | 2 | 2 | 3 | 3 | 3 |
| 3 | 3 | 1 | 8  | 2 | 2 | 3 | 3 | 3 |
| 1 | 1 | 1 | 11 | 2 | 2 | 3 | 3 | 3 |
| 1 | 4 | 1 | 8  | 3 | 3 | 3 | 3 | 3 |
| 1 | 5 | 1 | 8  | 3 | 2 | 3 | 3 | 3 |
| 1 | 4 | 1 | 8  | 2 | 2 | 3 | 3 | 3 |
| 1 | 4 | 1 | 8  | 2 | 2 | 3 | 3 | 3 |
| 1 | 4 | 1 | 8  | 3 | 2 | 3 | 3 | 4 |
| 3 | 4 | 1 | 8  | 2 | 2 | 3 | 4 | 1 |
| 1 | 2 | 2 | 6  | 2 | 2 | 3 | 4 | 2 |
| 1 | 4 | 1 | 8  | 2 | 2 | 3 | 4 | 2 |
| 1 | 4 | 1 | 8  | 2 | 2 | 3 | 4 | 2 |
| 1 | 4 | 1 | 8  | 2 | 2 | 3 | 2 | 3 |
| 1 | 1 | 1 | 8  | 2 | 2 | 3 | 4 | 3 |
| 1 | 4 | 1 | 8  | 3 | 2 | 3 | 4 | 3 |
| 1 | 1 | 1 | 10 | 2 | 2 | 3 | 4 | 3 |
| 1 | 1 | 1 | 8  | 2 | 2 | 3 | 4 | 3 |
| 1 | 4 | 1 | 8  | 2 | 2 | 3 | 4 | 3 |
| 3 | 4 | 1 | 8  | 2 | 2 | 3 | 4 | 3 |
| 1 | 4 | 1 | 8  | 2 | 2 | 3 | 4 | 3 |
| 1 | 4 | 1 | 8  | 2 | 2 | 3 | 4 | 3 |
| 1 | 4 | 1 | 8  | 2 | 2 | 3 | 4 | 3 |
| 1 | 4 | 1 | 8  | 2 | 2 | 3 | 4 | 3 |
| 1 | 2 | 2 | 2  | 2 | 2 | 4 | 1 | 1 |
| 1 | 5 | 1 | 8  | 2 | 2 | 4 | 1 | 1 |
| 3 | 2 | 1 | 10 | 2 | 2 | 3 | 2 | 2 |
| 1 | 5 | 1 | 8  | 2 | 2 | 4 | 1 | 1 |
| 1 | 2 | 2 | 0  | 2 | 2 | 4 | 1 | 1 |
| 3 | 2 | 1 | 9  | 2 | 2 | 4 | 1 | 1 |

|   |   |   |    |   |   |   |   |   |
|---|---|---|----|---|---|---|---|---|
| 3 | 2 | 1 | 9  | 2 | 2 | 4 | 1 | 1 |
| 1 | 3 | 2 | 0  | 2 | 2 | 4 | 1 | 2 |
| 1 | 5 | 1 | 8  | 2 | 2 | 4 | 1 | 2 |
| 1 | 5 | 1 | 8  | 2 | 2 | 4 | 1 | 2 |
| 1 | 2 | 2 | 0  | 2 | 2 | 4 | 1 | 2 |
| 1 | 2 | 2 | 0  | 2 | 2 | 4 | 1 | 2 |
| 1 | 2 | 1 | 7  | 2 | 2 | 4 | 1 | 2 |
| 1 | 2 | 1 | 8  | 2 | 2 | 3 | 3 | 3 |
| 1 | 1 | 2 | 8  | 2 | 2 | 3 | 1 | 1 |
| 1 | 2 | 1 | 7  | 2 | 2 | 4 | 1 | 2 |
| 1 | 2 | 1 | 6  | 2 | 2 | 4 | 1 | 2 |
| 1 | 2 | 2 | 0  | 2 | 2 | 4 | 1 | 2 |
| 1 | 2 | 2 | 2  | 2 | 2 | 4 | 1 | 3 |
| 1 | 2 | 1 | 6  | 2 | 2 | 4 | 1 | 3 |
| 1 | 3 | 1 | 8  | 2 | 2 | 4 | 2 | 2 |
| 3 | 4 | 1 | 8  | 2 | 2 | 4 | 2 | 2 |
| 1 | 4 | 1 | 8  | 2 | 2 | 4 | 2 | 4 |
| 1 | 2 | 1 | 6  | 2 | 2 | 4 | 3 | 1 |
| 1 | 4 | 1 | 8  | 4 | 3 | 4 | 3 | 2 |
| 1 | 4 | 1 | 12 | 2 | 2 | 2 | 2 | 2 |
| 1 | 2 | 1 | 6  | 2 | 2 | 4 | 3 | 2 |
| 3 | 4 | 1 | 8  | 2 | 2 | 4 | 3 | 2 |
| 1 | 2 | 1 | 0  | 2 | 2 | 4 | 3 | 2 |
| 1 | 3 | 2 | 0  | 2 | 2 | 4 | 3 | 2 |
| 3 | 4 | 1 | 8  | 2 | 2 | 4 | 3 | 2 |
| 1 | 3 | 2 | 0  | 2 | 2 | 4 | 3 | 2 |
| 1 | 3 | 2 | 0  | 2 | 2 | 4 | 3 | 2 |
| 1 | 2 | 1 | 6  | 2 | 2 | 4 | 3 | 3 |
| 2 | 2 | 1 | 9  | 2 | 2 | 4 | 3 | 3 |
| 3 | 2 | 1 | 9  | 2 | 2 | 4 | 3 | 3 |
| 1 | 3 | 1 | 11 | 2 | 2 | 4 | 3 | 3 |
| 2 | 3 | 1 | 8  | 2 | 2 | 3 | 1 | 1 |
| 1 | 3 | 2 | 6  | 2 | 2 | 4 | 3 | 3 |
| 1 | 5 | 1 | 8  | 2 | 2 | 4 | 3 | 3 |
| 1 | 5 | 1 | 8  | 3 | 2 | 4 | 3 | 3 |
| 1 | 4 | 1 | 8  | 2 | 2 | 4 | 3 | 4 |
| 1 | 2 | 1 | 7  | 2 | 2 | 4 | 4 | 2 |
| 1 | 4 | 1 | 8  | 2 | 2 | 4 | 4 | 3 |
| 1 | 5 | 1 | 8  | 2 | 2 | 3 | 2 | 2 |
| 1 | 5 | 1 | 8  | 2 | 2 | 2 | 3 | 2 |
| 1 | 5 | 1 | 8  | 2 | 2 | 3 | 2 | 1 |
| 1 | 2 | 1 | 7  | 1 | 1 | 3 | 3 | 2 |
| 2 | 2 | 1 | 8  | 2 | 2 | 4 | 4 | 3 |
| 1 | 2 | 1 | 7  | 1 | 1 | 1 | 3 | 3 |
| 1 | 2 | 1 | 7  | 1 | 1 | 4 | 3 | 2 |
| 1 | 2 | 1 | 7  | 1 | 1 | 3 | 2 | 1 |
| 1 | 2 | 1 | 7  | 1 | 1 | 4 | 3 | 2 |
| 1 | 2 | 1 | 7  | 1 | 1 | 3 | 2 | 2 |
| 1 | 2 | 1 | 7  | 1 | 1 | 4 | 2 | 2 |
| 1 | 2 | 1 | 7  | 1 | 1 | 2 | 1 | 1 |
| 1 | 2 | 1 | 7  | 1 | 1 | 3 | 3 | 2 |
| 1 | 3 | 1 | 8  | 1 | 1 | 1 | 2 | 4 |
| 1 | 3 | 1 | 8  | 1 | 1 | 3 | 1 | 1 |
| 1 | 1 | 1 | 8  | 2 | 2 | 4 | 3 | 3 |
| 1 | 3 | 1 | 8  | 1 | 1 | 3 | 3 | 2 |



|   |   |   |    |   |   |   |   |   |
|---|---|---|----|---|---|---|---|---|
| 1 | 3 | 1 | 8  | 1 | 1 | 3 | 2 | 3 |
| 1 | 3 | 1 | 8  | 1 | 1 | 3 | 2 | 3 |
| 1 | 3 | 1 | 8  | 1 | 1 | 2 | 1 | 2 |
| 1 | 3 | 1 | 12 | 1 | 1 | 1 | 2 | 3 |
| 1 | 3 | 2 | 11 | 1 | 1 | 3 | 3 | 2 |
| 1 | 1 | 1 | 9  | 2 | 1 | 2 | 3 | 1 |
| 1 | 1 | 1 | 10 | 2 | 1 | 2 | 3 | 2 |
| 1 | 1 | 1 | 10 | 2 | 1 | 2 | 1 | 3 |
| 1 | 1 | 1 | 10 | 2 | 1 | 3 | 4 | 2 |
| 3 | 4 | 1 | 6  | 2 | 2 | 3 | 1 | 1 |
| 3 | 4 | 1 | 8  | 2 | 1 | 2 | 2 | 1 |
| 3 | 4 | 1 | 8  | 2 | 1 | 2 | 4 | 3 |
| 3 | 4 | 1 | 8  | 2 | 1 | 2 | 3 | 3 |
| 3 | 4 | 1 | 8  | 2 | 1 | 2 | 2 | 2 |
| 1 | 4 | 1 | 8  | 2 | 2 | 3 | 2 | 2 |
| 1 | 2 | 1 | 8  | 2 | 2 | 4 | 2 | 3 |
| 1 | 3 | 1 | 8  | 2 | 2 | 3 | 1 | 1 |
| 1 | 4 | 1 | 8  | 2 | 2 | 3 | 2 | 2 |
| 1 | 4 | 1 | 6  | 2 | 2 | 3 | 2 | 2 |
| 1 | 2 | 1 | 7  | 2 | 2 | 2 | 2 | 2 |
| 1 | 4 | 1 | 10 | 2 | 2 | 3 | 2 | 2 |
| 1 | 3 | 1 | 8  | 2 | 2 | 4 | 3 | 3 |
| 1 | 3 | 1 | 9  | 3 | 2 | 1 | 1 | 1 |
| 1 | 2 | 2 | 0  | 2 | 0 | 4 | 1 | 2 |
| 1 | 2 | 2 | 0  | 2 | 0 | 4 | 1 | 2 |
| 1 | 2 | 2 | 0  | 2 | 0 | 4 | 1 | 2 |
| 1 | 4 | 1 | 8  | 2 | 2 | 3 | 2 | 1 |
| 1 | 5 | 1 | 12 | 2 | 2 | 3 | 3 | 3 |
| 1 | 1 | 1 | 8  | 2 | 0 | 3 | 2 | 1 |
| 1 | 4 | 1 | 6  | 2 | 2 | 4 | 3 | 2 |
| 1 | 3 | 1 | 10 | 2 | 2 | 2 | 2 | 2 |
| 3 | 2 | 1 | 9  | 3 | 3 | 3 | 1 | 1 |
| 3 | 1 | 1 | 8  | 2 | 2 | 4 | 2 | 3 |
| 1 | 2 | 1 | 9  | 2 | 2 | 4 | 1 | 1 |
| 1 | 5 | 1 | 8  | 2 | 2 | 3 | 2 | 2 |
| 1 | 5 | 1 | 8  | 2 | 2 | 3 | 2 | 2 |
| 3 | 1 | 1 | 8  | 2 | 2 | 2 | 2 | 2 |
| 1 | 2 | 1 | 9  | 2 | 2 | 3 | 2 | 2 |
| 1 | 3 | 1 | 2  | 2 | 2 | 3 | 2 | 2 |
| 2 | 2 | 1 | 8  | 2 | 2 | 4 | 2 | 3 |
| 1 | 1 | 1 | 8  | 2 | 2 | 3 | 3 | 2 |
| 1 | 2 | 1 | 8  | 2 | 2 | 3 | 1 | 1 |
| 1 | 2 | 1 | 8  | 2 | 2 | 1 | 2 | 4 |
| 1 | 2 | 1 | 8  | 2 | 2 | 3 | 3 | 2 |
| 2 | 4 | 1 | 10 | 2 | 2 | 2 | 1 | 1 |
| 1 | 2 | 2 | 0  | 2 | 0 | 4 | 2 | 2 |
| 1 | 2 | 2 | 0  | 2 | 0 | 3 | 2 | 1 |
| 1 | 4 | 2 | 8  | 2 | 2 | 4 | 3 | 2 |
| 1 | 4 | 1 | 2  | 2 | 2 | 2 | 2 | 2 |
| 3 | 4 | 1 | 8  | 2 | 2 | 3 | 1 | 3 |
| 1 | 4 | 1 | 8  | 2 | 2 | 3 | 2 | 2 |
| 1 | 5 | 1 | 10 | 4 | 2 | 3 | 2 | 2 |
| 1 | 3 | 1 | 7  | 2 | 2 | 4 | 4 | 2 |
| 1 | 4 | 1 | 7  | 2 | 2 | 4 | 3 | 3 |

|   |   |   |    |   |   |   |   |   |
|---|---|---|----|---|---|---|---|---|
| 1 | 3 | 1 | 8  | 2 | 2 | 2 | 4 | 2 |
| 3 | 4 | 1 | 8  | 1 | 1 | 3 | 3 | 3 |
| 1 | 1 | 1 | 8  | 2 | 2 | 4 | 3 | 2 |
| 1 | 2 | 1 | 7  | 2 | 2 | 3 | 2 | 1 |
| 1 | 3 | 2 | 0  | 2 | 0 | 4 | 3 | 1 |
| 1 | 1 | 1 | 7  | 2 | 2 | 3 | 4 | 3 |
| 1 | 2 | 1 | 8  | 3 | 2 | 3 | 1 | 1 |
| 1 | 1 | 1 | 8  | 2 | 2 | 4 | 4 | 4 |
| 1 | 3 | 1 | 8  | 2 | 2 | 2 | 1 | 1 |
| 1 | 3 | 1 | 9  | 2 | 2 | 2 | 3 | 1 |
| 1 | 5 | 1 | 8  | 2 | 2 | 3 | 2 | 1 |
| 1 | 4 | 1 | 8  | 2 | 2 | 4 | 2 | 1 |
| 1 | 2 | 1 | 8  | 2 | 2 | 1 | 2 | 3 |
| 1 | 4 | 1 | 8  | 2 | 2 | 3 | 2 | 2 |
| 1 | 3 | 1 | 8  | 2 | 2 | 3 | 1 | 1 |
| 1 | 3 | 1 | 8  | 2 | 2 | 1 | 2 | 1 |
| 2 | 4 | 1 | 8  | 2 | 2 | 1 | 2 | 1 |
| 1 | 4 | 1 | 8  | 2 | 2 | 1 | 2 | 1 |
| 1 | 2 | 2 | 2  | 2 | 2 | 1 | 3 | 2 |
| 1 | 3 | 1 | 8  | 2 | 2 | 2 | 2 | 2 |
| 1 | 2 | 2 | 0  | 2 | 2 | 1 | 3 | 2 |
| 1 | 2 | 2 | 0  | 2 | 2 | 1 | 3 | 3 |
| 3 | 2 | 1 | 9  | 2 | 2 | 1 | 4 | 1 |
| 1 | 1 | 1 | 10 | 2 | 2 | 1 | 4 | 1 |
| 1 | 1 | 1 | 8  | 2 | 2 | 1 | 4 | 1 |
| 1 | 3 | 2 | 0  | 2 | 2 | 1 | 4 | 1 |
| 1 | 1 | 1 | 10 | 2 | 2 | 1 | 4 | 1 |
| 1 | 1 | 1 | 10 | 2 | 2 | 1 | 4 | 1 |
| 1 | 2 | 2 | 6  | 2 | 2 | 1 | 4 | 1 |
| 1 | 1 | 1 | 10 | 2 | 2 | 1 | 4 | 1 |
| 3 | 2 | 1 | 11 | 2 | 2 | 3 | 1 | 2 |
| 1 | 1 | 1 | 10 | 2 | 2 | 1 | 4 | 2 |
| 1 | 3 | 1 | 8  | 2 | 2 | 1 | 4 | 2 |
| 2 | 2 | 1 | 9  | 2 | 2 | 1 | 4 | 3 |
| 1 | 2 | 1 | 6  | 2 | 2 | 2 | 1 | 2 |
| 3 | 4 | 1 | 8  | 2 | 2 | 2 | 1 | 3 |
| 1 | 5 | 1 | 8  | 2 | 2 | 2 | 1 | 4 |
| 1 | 2 | 2 | 0  | 2 | 2 | 2 | 2 | 1 |
| 1 | 2 | 1 | 6  | 2 | 2 | 2 | 2 | 1 |
| 3 | 4 | 1 | 8  | 2 | 2 | 2 | 2 | 1 |
| 1 | 3 | 1 | 8  | 2 | 2 | 2 | 2 | 1 |

| SE4 | SE5 | SE6 | SE7 | SE8 | SE9 | SE10 | ICL1 | ICL2 |
|-----|-----|-----|-----|-----|-----|------|------|------|
| 3   | 3   | 3   | 3   | 3   | 3   | 3    | 10   | 6    |
| 2   | 2   | 3   | 3   | 2   | 2   | 2    | 8    | 8    |
| 3   | 1   | 2   | 3   | 2   | 3   | 2    | 11   | 9    |
| 3   | 2   | 3   | 3   | 3   | 2   | 2    | 8    | 9    |
| 3   | 2   | 3   | 3   | 4   | 4   | 3    | 9    | 3    |
| 3   | 3   | 2   | 3   | 3   | 3   | 3    | 11   | 7    |
| 3   | 3   | 3   | 2   | 2   | 3   | 3    | 6    | 5    |
| 3   | 3   | 4   | 3   | 2   | 2   | 1    | 11   | 8    |
| 2   | 1   | 2   | 1   | 2   | 2   | 1    | 11   | 11   |
| 2   | 2   | 2   | 2   | 2   | 2   | 2    | 6    | 6    |
| 2   | 2   | 2   | 2   | 2   | 2   | 2    | 8    | 8    |
| 2   | 2   | 2   | 2   | 2   | 2   | 2    | 9    | 8    |
| 2   | 2   | 2   | 2   | 2   | 2   | 2    | 11   | 9    |
| 2   | 2   | 2   | 2   | 2   | 2   | 3    | 5    | 7    |
| 2   | 3   | 3   | 3   | 2   | 2   | 2    | 7    | 7    |
| 3   | 2   | 2   | 2   | 2   | 2   | 3    | 11   | 9    |
| 3   | 3   | 2   | 3   | 3   | 3   | 3    | 10   | 10   |
| 3   | 3   | 3   | 3   | 3   | 3   | 3    | 8    | 7    |
| 3   | 3   | 4   | 3   | 4   | 3   | 3    | 5    | 5    |
| 3   | 2   | 3   | 2   | 2   | 2   | 2    | 8    | 7    |
| 3   | 3   | 4   | 3   | 2   | 4   | 3    | 7    | 8    |
| 1   | 3   | 1   | 2   | 2   | 2   | 1    | 7    | 7    |
| 2   | 3   | 3   | 3   | 3   | 3   | 1    | 6    | 6    |
| 3   | 3   | 2   | 2   | 2   | 2   | 2    | 11   | 10   |
| 2   | 1   | 2   | 2   | 2   | 2   | 2    | 9    | 9    |
| 2   | 2   | 1   | 2   | 1   | 1   | 1    | 11   | 11   |
| 2   | 2   | 1   | 3   | 3   | 3   | 2    | 9    | 8    |
| 2   | 2   | 2   | 2   | 2   | 2   | 2    | 6    | 6    |
| 2   | 2   | 2   | 2   | 2   | 2   | 2    | 10   | 10   |
| 2   | 2   | 3   | 3   | 2   | 4   | 4    | 9    | 10   |
| 3   | 2   | 3   | 3   | 3   | 3   | 3    | 6    | 10   |
| 3   | 3   | 3   | 3   | 3   | 2   | 2    | 10   | 9    |
| 4   | 3   | 3   | 3   | 3   | 2   | 3    | 9    | 7    |
| 4   | 3   | 3   | 3   | 3   | 3   | 3    | 8    | 9    |
| 3   | 3   | 4   | 3   | 3   | 4   | 3    | 5    | 5    |
| 4   | 4   | 4   | 4   | 3   | 4   | 4    | 1    | 1    |
| 3   | 3   | 3   | 3   | 2   | 3   | 2    | 9    | 9    |
| 2   | 2   | 3   | 3   | 2   | 2   | 3    | 7    | 8    |
| 2   | 2   | 3   | 3   | 3   | 3   | 3    | 11   | 10   |
| 3   | 2   | 3   | 3   | 3   | 3   | 3    | 7    | 10   |
| 3   | 3   | 2   | 2   | 2   | 2   | 2    | 8    | 9    |
| 2   | 2   | 2   | 2   | 2   | 3   | 2    | 2    | 5    |
| 2   | 4   | 2   | 2   | 4   | 3   | 3    | 11   | 11   |
| 2   | 2   | 2   | 2   | 2   | 2   | 2    | 9    | 9    |
| 3   | 3   | 3   | 3   | 3   | 3   | 4    | 7    | 8    |
| 4   | 4   | 4   | 4   | 4   | 4   | 3    | 8    | 8    |
| 1   | 3   | 2   | 1   | 2   | 2   | 1    | 6    | 8    |
| 2   | 2   | 1   | 1   | 2   | 2   | 1    | 11   | 11   |
| 3   | 2   | 1   | 2   | 1   | 2   | 1    | 9    | 10   |
| 3   | 2   | 4   | 2   | 3   | 2   | 3    | 2    | 9    |

|   |   |   |   |   |   |   |    |    |
|---|---|---|---|---|---|---|----|----|
| 2 | 3 | 3 | 3 | 2 | 2 | 2 | 11 | 11 |
| 2 | 3 | 3 | 3 | 3 | 3 | 3 | 1  | 1  |
| 3 | 3 | 2 | 3 | 2 | 3 | 2 | 5  | 5  |
| 3 | 3 | 3 | 2 | 2 | 2 | 3 | 10 | 10 |
| 2 | 2 | 3 | 4 | 4 | 4 | 4 | 2  | 2  |
| 2 | 3 | 3 | 1 | 2 | 1 | 2 | 7  | 8  |
| 3 | 3 | 3 | 3 | 2 | 3 | 2 | 6  | 6  |
| 3 | 2 | 4 | 4 | 4 | 3 | 3 | 6  | 6  |
| 3 | 3 | 4 | 4 | 3 | 4 | 4 | 11 | 11 |
| 1 | 1 | 3 | 3 | 1 | 1 | 2 | 11 | 11 |
| 2 | 2 | 2 | 2 | 2 | 2 | 2 | 10 | 10 |
| 2 | 3 | 3 | 1 | 2 | 3 | 3 | 7  | 6  |
| 1 | 2 | 3 | 4 | 2 | 2 | 2 | 11 | 11 |
| 2 | 2 | 3 | 2 | 1 | 2 | 2 | 8  | 8  |
| 2 | 2 | 3 | 3 | 3 | 3 | 3 | 8  | 11 |
| 2 | 3 | 3 | 3 | 2 | 2 | 2 | 11 | 11 |
| 2 | 3 | 4 | 3 | 2 | 3 | 3 | 8  | 6  |
| 3 | 3 | 3 | 3 | 3 | 3 | 3 | 8  | 9  |
| 2 | 3 | 4 | 4 | 2 | 4 | 4 | 9  | 11 |
| 3 | 1 | 1 | 2 | 2 | 2 | 2 | 5  | 8  |
| 3 | 3 | 2 | 3 | 3 | 3 | 3 | 8  | 9  |
| 3 | 3 | 3 | 3 | 3 | 3 | 3 | 8  | 8  |
| 3 | 3 | 3 | 3 | 3 | 3 | 3 | 8  | 10 |
| 1 | 2 | 2 | 1 | 2 | 3 | 2 | 10 | 10 |
| 2 | 2 | 2 | 1 | 2 | 1 | 2 | 6  | 8  |
| 2 | 2 | 2 | 2 | 2 | 2 | 1 | 6  | 9  |
| 2 | 3 | 3 | 2 | 2 | 1 | 1 | 7  | 8  |
| 3 | 3 | 3 | 3 | 3 | 3 | 3 | 9  | 8  |
| 3 | 3 | 3 | 3 | 3 | 3 | 4 | 10 | 9  |
| 3 | 3 | 3 | 3 | 3 | 4 | 4 | 11 | 11 |
| 4 | 3 | 4 | 2 | 3 | 4 | 2 | 6  | 7  |
| 4 | 4 | 3 | 4 | 4 | 4 | 2 | 7  | 7  |
| 4 | 4 | 4 | 4 | 3 | 4 | 4 | 1  | 1  |
| 4 | 4 | 4 | 4 | 4 | 4 | 3 | 5  | 5  |
| 3 | 3 | 4 | 3 | 4 | 3 | 3 | 7  | 5  |
| 3 | 2 | 2 | 2 | 3 | 2 | 2 | 3  | 3  |
| 2 | 2 | 2 | 1 | 2 | 2 | 2 | 11 | 10 |
| 2 | 2 | 2 | 2 | 2 | 2 | 2 | 9  | 7  |
| 2 | 2 | 2 | 2 | 2 | 2 | 3 | 11 | 11 |
| 3 | 3 | 3 | 3 | 3 | 3 | 3 | 2  | 2  |
| 2 | 3 | 3 | 3 | 3 | 3 | 3 | 8  | 8  |
| 2 | 4 | 3 | 3 | 3 | 2 | 4 | 5  | 5  |
| 3 | 2 | 3 | 2 | 3 | 3 | 3 | 1  | 3  |
| 3 | 3 | 3 | 3 | 2 | 3 | 3 | 9  | 7  |
| 3 | 3 | 3 | 3 | 3 | 3 | 3 | 6  | 5  |
| 3 | 3 | 3 | 3 | 3 | 3 | 3 | 6  | 9  |
| 3 | 3 | 3 | 3 | 3 | 3 | 3 | 8  | 10 |
| 3 | 4 | 3 | 4 | 4 | 4 | 4 | 6  | 5  |
| 1 | 2 | 3 | 3 | 1 | 1 | 1 | 11 | 11 |
| 2 | 2 | 1 | 2 | 2 | 2 | 2 | 6  | 6  |
| 3 | 2 | 3 | 3 | 3 | 3 | 1 | 8  | 8  |
| 2 | 2 | 2 | 2 | 2 | 3 | 2 | 6  | 8  |
| 3 | 2 | 3 | 2 | 3 | 3 | 2 | 6  | 8  |
| 3 | 3 | 3 | 2 | 3 | 2 | 2 | 8  | 9  |

|   |   |   |   |   |   |   |    |    |
|---|---|---|---|---|---|---|----|----|
| 3 | 3 | 3 | 3 | 3 | 3 | 3 | 10 | 10 |
| 2 | 2 | 2 | 2 | 2 | 2 | 2 | 7  | 7  |
| 2 | 2 | 2 | 2 | 2 | 2 | 2 | 9  | 10 |
| 2 | 2 | 2 | 2 | 3 | 3 | 2 | 7  | 7  |
| 2 | 3 | 2 | 2 | 2 | 2 | 3 | 6  | 6  |
| 2 | 4 | 3 | 4 | 3 | 4 | 4 | 9  | 10 |
| 3 | 2 | 2 | 2 | 2 | 2 | 2 | 8  | 10 |
| 2 | 2 | 2 | 2 | 2 | 2 | 2 | 3  | 3  |
| 3 | 3 | 3 | 3 | 2 | 3 | 2 | 6  | 6  |
| 3 | 2 | 2 | 2 | 3 | 3 | 3 | 6  | 6  |
| 3 | 2 | 3 | 3 | 3 | 3 | 2 | 9  | 9  |
| 3 | 3 | 3 | 3 | 3 | 3 | 3 | 8  | 7  |
| 2 | 2 | 2 | 2 | 2 | 2 | 2 | 9  | 10 |
| 3 | 3 | 3 | 3 | 3 | 3 | 3 | 2  | 1  |
| 2 | 2 | 4 | 2 | 2 | 3 | 3 | 11 | 11 |
| 3 | 2 | 1 | 3 | 3 | 3 | 3 | 7  | 7  |
| 3 | 3 | 4 | 3 | 4 | 4 | 3 | 11 | 11 |
| 2 | 2 | 2 | 2 | 3 | 3 | 2 | 6  | 7  |
| 1 | 3 | 3 | 2 | 3 | 3 | 2 | 9  | 8  |
| 2 | 2 | 2 | 2 | 2 | 2 | 2 | 8  | 9  |
| 2 | 1 | 1 | 2 | 2 | 2 | 1 | 7  | 8  |
| 2 | 2 | 2 | 1 | 2 | 2 | 2 | 11 | 10 |
| 2 | 2 | 2 | 3 | 3 | 3 | 1 | 10 | 7  |
| 2 | 3 | 2 | 2 | 3 | 3 | 3 | 9  | 9  |
| 2 | 3 | 3 | 2 | 3 | 3 | 3 | 8  | 7  |
| 2 | 1 | 2 | 2 | 2 | 2 | 2 | 5  | 5  |
| 2 | 2 | 1 | 2 | 1 | 2 | 2 | 10 | 9  |
| 3 | 2 | 3 | 3 | 3 | 3 | 3 | 8  | 8  |
| 3 | 2 | 3 | 3 | 3 | 3 | 3 | 8  | 8  |
| 3 | 3 | 3 | 2 | 2 | 3 | 3 | 9  | 11 |
| 1 | 1 | 1 | 3 | 3 | 3 | 3 | 11 | 11 |
| 3 | 3 | 3 | 2 | 3 | 3 | 4 | 9  | 10 |
| 3 | 3 | 3 | 3 | 3 | 3 | 3 | 9  | 9  |
| 4 | 3 | 4 | 4 | 4 | 3 | 4 | 6  | 5  |
| 3 | 3 | 3 | 3 | 3 | 3 | 3 | 11 | 11 |
| 2 | 3 | 3 | 3 | 3 | 2 | 3 | 8  | 10 |
| 4 | 3 | 3 | 3 | 3 | 3 | 3 | 6  | 5  |
| 2 | 2 | 2 | 1 | 2 | 3 | 2 | 5  | 6  |
| 3 | 3 | 3 | 2 | 3 | 3 | 2 | 10 | 9  |
| 3 | 3 | 3 | 2 | 2 | 3 | 1 | 10 | 9  |
| 3 | 2 | 2 | 2 | 3 | 3 | 2 | 6  | 6  |
| 3 | 3 | 3 | 3 | 3 | 3 | 3 | 11 | 11 |
| 3 | 3 | 3 | 2 | 3 | 3 | 3 | 1  | 1  |
| 3 | 2 | 3 | 2 | 2 | 2 | 1 | 3  | 4  |
| 2 | 1 | 3 | 2 | 1 | 2 | 1 | 11 | 11 |
| 2 | 3 | 2 | 2 | 2 | 2 | 2 | 7  | 8  |
| 3 | 3 | 3 | 2 | 3 | 3 | 2 | 8  | 8  |
| 3 | 4 | 3 | 2 | 3 | 3 | 3 | 8  | 9  |
| 2 | 3 | 1 | 1 | 2 | 2 | 1 | 11 | 11 |
| 3 | 2 | 4 | 1 | 1 | 2 | 1 | 10 | 11 |
| 4 | 3 | 4 | 4 | 3 | 3 | 3 | 1  | 2  |
| 3 | 3 | 2 | 4 | 3 | 3 | 2 | 10 | 11 |
| 3 | 3 | 3 | 3 | 3 | 3 | 3 | 6  | 4  |
| 3 | 2 | 2 | 3 | 4 | 3 | 3 | 7  | 8  |

|   |   |   |   |   |   |   |    |    |
|---|---|---|---|---|---|---|----|----|
| 4 | 3 | 4 | 4 | 4 | 4 | 4 | 1  | 1  |
| 2 | 2 | 3 | 2 | 2 | 2 | 1 | 8  | 6  |
| 2 | 2 | 3 | 2 | 3 | 4 | 2 | 7  | 8  |
| 1 | 2 | 2 | 2 | 2 | 3 | 2 | 8  | 8  |
| 2 | 2 | 2 | 3 | 2 | 3 | 2 | 11 | 11 |
| 3 | 4 | 2 | 3 | 3 | 3 | 3 | 9  | 9  |
| 2 | 2 | 3 | 3 | 3 | 2 | 2 | 10 | 11 |
| 3 | 3 | 1 | 2 | 3 | 1 | 3 | 4  | 4  |
| 3 | 1 | 3 | 3 | 2 | 3 | 3 | 10 | 11 |
| 1 | 2 | 1 | 1 | 1 | 1 | 1 | 11 | 11 |
| 1 | 1 | 1 | 1 | 1 | 1 | 2 | 11 | 10 |
| 3 | 3 | 4 | 3 | 3 | 3 | 3 | 5  | 4  |
| 4 | 4 | 4 | 4 | 4 | 4 | 4 | 9  | 10 |
| 3 | 4 | 4 | 3 | 3 | 3 | 3 | 11 | 10 |
| 3 | 3 | 2 | 3 | 3 | 3 | 3 | 11 | 11 |
| 3 | 3 | 4 | 4 | 3 | 3 | 3 | 7  | 6  |
| 3 | 1 | 4 | 3 | 4 | 4 | 3 | 9  | 9  |
| 2 | 2 | 2 | 2 | 2 | 2 | 2 | 10 | 10 |
| 2 | 3 | 2 | 2 | 2 | 3 | 3 | 7  | 7  |
| 2 | 2 | 3 | 3 | 2 | 3 | 2 | 8  | 8  |
| 2 | 3 | 3 | 4 | 4 | 4 | 4 | 10 | 10 |
| 3 | 3 | 3 | 3 | 3 | 3 | 3 | 9  | 9  |
| 3 | 3 | 1 | 4 | 3 | 3 | 3 | 5  | 4  |
| 2 | 3 | 3 | 3 | 2 | 2 | 2 | 11 | 11 |
| 3 | 3 | 3 | 3 | 2 | 2 | 2 | 8  | 9  |
| 3 | 3 | 3 | 3 | 2 | 2 | 2 | 5  | 5  |
| 2 | 2 | 2 | 2 | 2 | 2 | 1 | 7  | 7  |
| 3 | 3 | 3 | 3 | 3 | 3 | 3 | 8  | 8  |
| 3 | 3 | 3 | 3 | 3 | 3 | 3 | 10 | 9  |
| 2 | 2 | 2 | 3 | 2 | 2 | 2 | 11 | 11 |
| 2 | 2 | 2 | 2 | 2 | 2 | 2 | 9  | 8  |
| 3 | 2 | 3 | 2 | 3 | 3 | 2 | 8  | 8  |
| 2 | 2 | 3 | 2 | 2 | 1 | 1 | 9  | 6  |
| 3 | 3 | 2 | 2 | 3 | 3 | 3 | 9  | 9  |
| 3 | 2 | 2 | 2 | 2 | 2 | 2 | 9  | 9  |
| 2 | 2 | 2 | 3 | 3 | 2 | 2 | 10 | 7  |
| 2 | 2 | 2 | 2 | 2 | 2 | 2 | 6  | 5  |
| 2 | 2 | 2 | 2 | 2 | 2 | 2 | 7  | 6  |
| 3 | 3 | 3 | 3 | 3 | 3 | 3 | 8  | 8  |
| 4 | 3 | 4 | 4 | 4 | 4 | 4 | 1  | 1  |
| 3 | 2 | 3 | 3 | 3 | 3 | 3 | 8  | 8  |
| 3 | 3 | 3 | 3 | 3 | 3 | 2 | 11 | 11 |
| 4 | 3 | 4 | 4 | 3 | 3 | 3 | 2  | 2  |
| 3 | 2 | 3 | 1 | 2 | 2 | 1 | 11 | 11 |
| 2 | 1 | 1 | 2 | 2 | 2 | 1 | 11 | 11 |
| 3 | 3 | 3 | 3 | 3 | 3 | 3 | 9  | 9  |
| 3 | 3 | 3 | 3 | 2 | 2 | 2 | 8  | 8  |
| 2 | 2 | 3 | 3 | 2 | 3 | 3 | 10 | 9  |
| 2 | 2 | 2 | 1 | 1 | 2 | 1 | 11 | 11 |
| 3 | 3 | 4 | 3 | 3 | 3 | 3 | 7  | 7  |
| 3 | 2 | 3 | 3 | 3 | 3 | 2 | 9  | 8  |
| 3 | 3 | 3 | 3 | 3 | 3 | 2 | 9  | 8  |
| 3 | 3 | 3 | 4 | 4 | 4 | 3 | 11 | 11 |
| 3 | 3 | 4 | 4 | 4 | 4 | 4 | 6  | 6  |

|   |   |   |   |   |   |   |    |    |
|---|---|---|---|---|---|---|----|----|
| 2 | 2 | 2 | 4 | 2 | 3 | 3 | 11 | 11 |
| 3 | 3 | 3 | 3 | 3 | 3 | 3 | 9  | 8  |
| 2 | 2 | 2 | 2 | 2 | 2 | 2 | 8  | 8  |
| 1 | 1 | 3 | 3 | 1 | 2 | 1 | 11 | 11 |
| 3 | 2 | 3 | 3 | 2 | 2 | 1 | 4  | 4  |
| 3 | 2 | 3 | 3 | 2 | 3 | 3 | 9  | 9  |
| 3 | 1 | 3 | 3 | 2 | 2 | 2 | 10 | 10 |
| 3 | 3 | 3 | 3 | 3 | 3 | 3 | 6  | 6  |
| 3 | 1 | 2 | 2 | 2 | 2 | 1 | 9  | 9  |
| 1 | 3 | 1 | 2 | 2 | 2 | 1 | 6  | 6  |
| 2 | 2 | 2 | 2 | 2 | 3 | 2 | 8  | 6  |
| 2 | 2 | 2 | 2 | 2 | 2 | 2 | 9  | 9  |
| 3 | 3 | 3 | 3 | 3 | 3 | 3 | 1  | 1  |
| 3 | 2 | 2 | 3 | 3 | 3 | 2 | 7  | 6  |
| 3 | 3 | 3 | 3 | 2 | 3 | 1 | 11 | 9  |
| 2 | 1 | 2 | 1 | 1 | 2 | 2 | 11 | 11 |
| 2 | 3 | 1 | 4 | 3 | 3 | 3 | 3  | 4  |
| 3 | 1 | 2 | 2 | 2 | 2 | 1 | 10 | 9  |
| 2 | 3 | 3 | 2 | 2 | 4 | 2 | 11 | 11 |
| 3 | 3 | 3 | 3 | 3 | 3 | 2 | 11 | 9  |
| 3 | 3 | 3 | 2 | 2 | 4 | 2 | 10 | 11 |
| 3 | 2 | 3 | 2 | 4 | 2 | 1 | 4  | 5  |
| 1 | 1 | 1 | 1 | 2 | 1 | 1 | 11 | 11 |
| 1 | 1 | 1 | 3 | 2 | 3 | 3 | 11 | 11 |
| 2 | 2 | 2 | 2 | 2 | 2 | 3 | 5  | 6  |
| 2 | 3 | 3 | 2 | 1 | 2 | 2 | 9  | 10 |
| 3 | 1 | 2 | 3 | 3 | 4 | 4 | 8  | 10 |
| 3 | 3 | 1 | 3 | 3 | 2 | 1 | 10 | 10 |
| 3 | 3 | 3 | 2 | 3 | 2 | 2 | 4  | 7  |
| 3 | 3 | 3 | 3 | 2 | 2 | 3 | 11 | 7  |
| 2 | 2 | 2 | 2 | 2 | 3 | 2 | 6  | 6  |
| 3 | 2 | 2 | 2 | 2 | 2 | 2 | 10 | 8  |
| 3 | 2 | 4 | 3 | 3 | 4 | 3 | 8  | 9  |
| 2 | 2 | 3 | 3 | 3 | 2 | 2 | 8  | 7  |
| 3 | 3 | 3 | 3 | 3 | 2 | 3 | 11 | 10 |
| 3 | 3 | 3 | 3 | 3 | 3 | 3 | 1  | 1  |
| 4 | 3 | 4 | 3 | 3 | 4 | 3 | 1  | 1  |
| 1 | 1 | 1 | 1 | 2 | 1 | 1 | 11 | 11 |
| 1 | 1 | 2 | 3 | 2 | 3 | 3 | 11 | 11 |
| 2 | 3 | 3 | 3 | 3 | 3 | 2 | 7  | 5  |
| 2 | 3 | 4 | 1 | 3 | 3 | 3 | 4  | 5  |

| ICL3 | ECL1 | ECL2 | ECL3 | GCL1 | GCL2 | GCL3 | GCL4 | mentalde<br>mand |
|------|------|------|------|------|------|------|------|------------------|
| 6    | 7    | 7    | 7    | 10   | 10   | 10   | 9    | 13               |
| 7    | 7    | 6    | 6    | 6    | 6    | 6    | 6    | 12               |
| 10   | 7    | 7    | 6    | 8    | 9    | 7    | 10   | 20               |
| 7    | 1    | 1    | 3    | 11   | 11   | 11   | 11   | 17               |
| 9    | 2    | 2    | 2    | 11   | 11   | 11   | 11   | 19               |
| 11   | 7    | 8    | 8    | 10   | 8    | 11   | 11   | 20               |
| 7    | 3    | 8    | 5    | 6    | 6    | 6    | 7    | 9                |
| 9    | 1    | 2    | 1    | 11   | 11   | 11   | 11   | 18               |
| 11   | 11   | 11   | 11   | 11   | 11   | 11   | 11   | 20               |
| 5    | 6    | 8    | 9    | 6    | 8    | 7    | 7    | 10               |
| 10   | 7    | 10   | 8    | 9    | 9    | 9    | 7    | 13               |
| 9    | 8    | 9    | 9    | 8    | 9    | 9    | 10   | 16               |
| 10   | 6    | 6    | 6    | 6    | 6    | 6    | 6    | 11               |
| 6    | 2    | 3    | 6    | 6    | 7    | 6    | 5    | 13               |
| 10   | 6    | 6    | 6    | 8    | 7    | 7    | 8    | 14               |
| 10   | 9    | 11   | 7    | 9    | 9    | 8    | 10   | 16               |
| 6    | 3    | 9    | 7    | 6    | 7    | 6    | 5    | 13               |
| 7    | 7    | 7    | 7    | 10   | 10   | 9    | 10   | 11               |
| 5    | 2    | 1    | 1    | 11   | 11   | 11   | 11   | 13               |
| 8    | 6    | 7    | 6    | 6    | 5    | 6    | 7    | 14               |
| 6    | 7    | 5    | 8    | 11   | 9    | 9    | 9    | 16               |
| 4    | 8    | 11   | 5    | 7    | 7    | 9    | 8    | 15               |
| 6    | 3    | 6    | 7    | 6    | 6    | 7    | 6    | 11               |
| 9    | 9    | 9    | 9    | 10   | 9    | 8    | 9    | 18               |
| 8    | 7    | 10   | 9    | 7    | 10   | 9    | 10   | 18               |
| 11   | 11   | 11   | 11   | 11   | 11   | 11   | 11   | 20               |
| 7    | 5    | 5    | 8    | 8    | 7    | 8    | 7    | 16               |
| 5    | 6    | 7    | 6    | 7    | 7    | 7    | 7    | 12               |
| 10   | 9    | 10   | 8    | 9    | 9    | 9    | 9    | 18               |
| 10   | 10   | 11   | 10   | 10   | 9    | 10   | 11   | 16               |
| 6    | 7    | 7    | 7    | 10   | 9    | 10   | 10   | 13               |
| 7    | 5    | 7    | 7    | 5    | 6    | 6    | 7    | 15               |
| 7    | 6    | 5    | 7    | 8    | 6    | 10   | 7    | 13               |
| 7    | 7    | 9    | 8    | 8    | 6    | 10   | 8    | 13               |
| 5    | 1    | 1    | 2    | 11   | 11   | 11   | 11   | 11               |
| 1    | 1    | 1    | 1    | 11   | 11   | 11   | 11   | 18               |
| 8    | 2    | 4    | 3    | 9    | 8    | 9    | 9    | 15               |
| 4    | 7    | 3    | 6    | 5    | 6    | 7    | 6    | 11               |
| 10   | 9    | 6    | 7    | 7    | 10   | 10   | 9    | 20               |
| 9    | 8    | 4    | 10   | 6    | 7    | 8    | 7    | 15               |
| 7    | 5    | 7    | 6    | 5    | 6    | 7    | 6    | 13               |
| 2    | 3    | 2    | 4    | 2    | 3    | 4    | 3    | 6                |
| 11   | 11   | 11   | 10   | 10   | 10   | 8    | 9    | 18               |
| 8    | 8    | 11   | 6    | 8    | 9    | 9    | 8    | 13               |
| 6    | 2    | 7    | 11   | 11   | 8    | 5    | 8    | 12               |
| 8    | 1    | 1    | 2    | 11   | 11   | 11   | 11   | 15               |
| 4    | 10   | 8    | 6    | 9    | 7    | 8    | 7    | 13               |
| 11   | 7    | 7    | 9    | 6    | 6    | 7    | 5    | 18               |
| 9    | 9    | 5    | 5    | 9    | 9    | 8    | 9    | 19               |
| 9    | 2    | 1    | 3    | 11   | 11   | 9    | 10   | 21               |



|    |    |    |    |    |    |    |    |    |
|----|----|----|----|----|----|----|----|----|
| 11 | 1  | 1  | 1  | 11 | 11 | 11 | 11 | 15 |
| 1  | 1  | 1  | 1  | 11 | 11 | 10 | 11 | 16 |
| 5  | 1  | 1  | 1  | 11 | 11 | 11 | 11 | 15 |
| 10 | 1  | 1  | 1  | 11 | 11 | 11 | 11 | 14 |
| 2  | 2  | 1  | 2  | 11 | 11 | 11 | 11 | 18 |
| 9  | 7  | 8  | 9  | 11 | 11 | 11 | 11 | 17 |
| 6  | 5  | 6  | 5  | 7  | 6  | 6  | 6  | 11 |
| 7  | 1  | 1  | 1  | 11 | 11 | 11 | 9  | 10 |
| 11 | 1  | 1  | 4  | 11 | 11 | 10 | 11 | 19 |
| 11 | 7  | 4  | 4  | 7  | 7  | 6  | 6  | 20 |
| 7  | 8  | 11 | 8  | 10 | 9  | 9  | 8  | 17 |
| 7  | 6  | 8  | 7  | 8  | 8  | 8  | 9  | 16 |
| 11 | 7  | 6  | 6  | 11 | 11 | 11 | 11 | 12 |
| 11 | 11 | 8  | 8  | 9  | 10 | 9  | 8  | 14 |
| 10 | 11 | 9  | 11 | 11 | 10 | 9  | 10 | 20 |
| 11 | 1  | 1  | 1  | 11 | 11 | 11 | 11 | 10 |
| 9  | 4  | 5  | 4  | 8  | 8  | 7  | 9  | 15 |
| 8  | 8  | 8  | 8  | 8  | 8  | 8  | 8  | 16 |
| 10 | 7  | 5  | 8  | 7  | 6  | 6  | 6  | 16 |
| 8  | 7  | 7  | 6  | 6  | 9  | 5  | 9  | 17 |
| 8  | 5  | 5  | 6  | 8  | 7  | 9  | 8  | 15 |
| 11 | 1  | 1  | 1  | 11 | 11 | 11 | 10 | 11 |
| 9  | 1  | 1  | 1  | 11 | 11 | 11 | 11 | 9  |
| 10 | 6  | 7  | 5  | 7  | 5  | 6  | 6  | 11 |
| 8  | 3  | 3  | 3  | 9  | 10 | 8  | 9  | 19 |
| 9  | 8  | 7  | 9  | 11 | 11 | 10 | 11 | 16 |
| 9  | 5  | 6  | 7  | 7  | 5  | 6  | 6  | 15 |
| 10 | 8  | 8  | 11 | 9  | 8  | 11 | 9  | 18 |
| 9  | 8  | 9  | 8  | 8  | 9  | 9  | 8  | 18 |
| 11 | 5  | 1  | 6  | 11 | 11 | 11 | 11 | 18 |
| 6  | 1  | 1  | 1  | 10 | 11 | 10 | 11 | 11 |
| 10 | 1  | 2  | 1  | 11 | 11 | 11 | 11 | 12 |
| 1  | 1  | 1  | 1  | 11 | 11 | 11 | 11 | 20 |
| 5  | 1  | 2  | 1  | 11 | 10 | 11 | 11 | 15 |
| 6  | 8  | 5  | 5  | 6  | 5  | 7  | 6  | 13 |
| 6  | 4  | 2  | 3  | 7  | 8  | 9  | 8  | 10 |
| 10 | 8  | 7  | 7  | 8  | 6  | 10 | 8  | 16 |
| 8  | 6  | 5  | 7  | 5  | 6  | 7  | 6  | 14 |
| 11 | 9  | 5  | 5  | 11 | 11 | 11 | 11 | 10 |
| 2  | 1  | 1  | 1  | 8  | 9  | 9  | 9  | 17 |
| 9  | 8  | 8  | 8  | 10 | 8  | 6  | 8  | 17 |
| 4  | 7  | 4  | 6  | 11 | 11 | 11 | 11 | 12 |
| 2  | 1  | 1  | 1  | 10 | 9  | 7  | 9  | 18 |
| 8  | 8  | 8  | 8  | 10 | 8  | 8  | 7  | 19 |
| 3  | 6  | 6  | 5  | 11 | 11 | 11 | 11 | 12 |
| 9  | 8  | 10 | 6  | 10 | 6  | 8  | 8  | 9  |
| 9  | 9  | 10 | 8  | 9  | 9  | 9  | 1  | 18 |
| 5  | 3  | 3  | 2  | 11 | 11 | 9  | 9  | 17 |
| 11 | 6  | 3  | 6  | 6  | 6  | 8  | 6  | 20 |
| 9  | 8  | 4  | 2  | 8  | 10 | 8  | 9  | 18 |
| 8  | 5  | 5  | 5  | 8  | 8  | 8  | 8  | 16 |
| 8  | 4  | 3  | 2  | 10 | 10 | 7  | 9  | 19 |
| 10 | 1  | 2  | 2  | 11 | 11 | 11 | 11 | 13 |
| 7  | 5  | 6  | 7  | 5  | 6  | 7  | 6  | 11 |

|    |    |    |    |    |    |    |    |    |
|----|----|----|----|----|----|----|----|----|
| 6  | 2  | 3  | 4  | 9  | 8  | 9  | 9  | 13 |
| 7  | 7  | 7  | 6  | 6  | 6  | 8  | 9  | 15 |
| 11 | 11 | 9  | 10 | 11 | 10 | 10 | 9  | 18 |
| 9  | 4  | 5  | 4  | 11 | 11 | 10 | 11 | 11 |
| 8  | 6  | 8  | 7  | 9  | 8  | 8  | 8  | 14 |
| 11 | 8  | 3  | 9  | 7  | 6  | 6  | 6  | 14 |
| 9  | 8  | 10 | 9  | 8  | 9  | 10 | 9  | 15 |
| 3  | 3  | 3  | 3  | 3  | 3  | 3  | 3  | 6  |
| 6  | 6  | 4  | 4  | 5  | 5  | 5  | 5  | 13 |
| 7  | 5  | 6  | 5  | 7  | 6  | 5  | 6  | 9  |
| 8  | 6  | 9  | 7  | 7  | 7  | 7  | 7  | 13 |
| 8  | 6  | 3  | 4  | 8  | 7  | 8  | 9  | 13 |
| 11 | 5  | 8  | 5  | 5  | 6  | 6  | 7  | 9  |
| 3  | 1  | 1  | 1  | 7  | 10 | 9  | 9  | 15 |
| 11 | 11 | 11 | 10 | 9  | 10 | 9  | 9  | 19 |
| 10 | 5  | 7  | 3  | 8  | 7  | 9  | 8  | 16 |
| 11 | 3  | 1  | 2  | 10 | 11 | 11 | 11 | 19 |
| 10 | 5  | 5  | 3  | 11 | 11 | 10 | 11 | 11 |
| 3  | 1  | 2  | 3  | 11 | 10 | 10 | 10 | 16 |
| 9  | 9  | 8  | 9  | 9  | 9  | 9  | 9  | 18 |
| 6  | 5  | 5  | 4  | 9  | 9  | 8  | 9  | 18 |
| 10 | 6  | 9  | 7  | 10 | 8  | 8  | 6  | 12 |
| 7  | 5  | 8  | 2  | 8  | 7  | 9  | 8  | 13 |
| 7  | 5  | 5  | 6  | 8  | 7  | 7  | 8  | 12 |
| 8  | 5  | 7  | 6  | 10 | 8  | 6  | 7  | 9  |
| 5  | 3  | 2  | 4  | 3  | 2  | 3  | 4  | 3  |
| 11 | 10 | 9  | 11 | 11 | 10 | 9  | 10 | 18 |
| 8  | 8  | 7  | 8  | 9  | 8  | 7  | 9  | 15 |
| 9  | 8  | 9  | 7  | 9  | 7  | 8  | 8  | 13 |
| 7  | 4  | 6  | 7  | 9  | 9  | 8  | 8  | 13 |
| 11 | 11 | 1  | 11 | 5  | 11 | 11 | 11 | 18 |
| 9  | 8  | 8  | 9  | 10 | 7  | 9  | 8  | 19 |
| 10 | 8  | 10 | 7  | 10 | 9  | 7  | 8  | 15 |
| 5  | 3  | 3  | 2  | 11 | 9  | 9  | 11 | 16 |
| 11 | 3  | 5  | 4  | 11 | 11 | 11 | 11 | 15 |
| 9  | 6  | 5  | 5  | 9  | 9  | 8  | 8  | 17 |
| 7  | 5  | 6  | 7  | 7  | 6  | 6  | 5  | 13 |
| 7  | 2  | 3  | 6  | 4  | 6  | 8  | 6  | 13 |
| 7  | 6  | 8  | 5  | 5  | 6  | 7  | 6  | 17 |
| 9  | 1  | 1  | 2  | 10 | 11 | 11 | 11 | 18 |
| 7  | 5  | 5  | 6  | 8  | 4  | 6  | 6  | 13 |
| 11 | 3  | 1  | 8  | 11 | 11 | 11 | 11 | 17 |
| 1  | 1  | 1  | 1  | 11 | 11 | 10 | 11 | 18 |
| 5  | 4  | 2  | 3  | 10 | 8  | 7  | 7  | 15 |
| 11 | 8  | 2  | 5  | 7  | 6  | 7  | 6  | 20 |
| 9  | 7  | 5  | 6  | 5  | 6  | 7  | 6  | 15 |
| 10 | 9  | 6  | 7  | 6  | 7  | 7  | 8  | 17 |
| 10 | 2  | 1  | 1  | 10 | 11 | 11 | 11 | 13 |
| 11 | 7  | 5  | 11 | 7  | 4  | 7  | 6  | 20 |
| 10 | 8  | 7  | 7  | 6  | 8  | 9  | 9  | 17 |
| 3  | 2  | 1  | 2  | 11 | 10 | 11 | 11 | 20 |
| 8  | 8  | 6  | 9  | 11 | 8  | 11 | 10 | 20 |
| 4  | 6  | 4  | 7  | 11 | 11 | 11 | 11 | 11 |
| 8  | 7  | 5  | 6  | 8  | 8  | 6  | 9  | 14 |

|    |    |    |    |    |    |    |    |    |
|----|----|----|----|----|----|----|----|----|
| 1  | 2  | 1  | 1  | 10 | 11 | 11 | 11 | 20 |
| 10 | 7  | 8  | 9  | 11 | 10 | 11 | 11 | 18 |
| 9  | 1  | 2  | 2  | 11 | 11 | 11 | 11 | 17 |
| 10 | 9  | 8  | 8  | 8  | 8  | 10 | 8  | 17 |
| 11 | 10 | 3  | 6  | 10 | 11 | 11 | 11 | 14 |
| 8  | 4  | 2  | 3  | 9  | 10 | 9  | 9  | 17 |
| 12 | 1  | 2  | 1  | 11 | 11 | 11 | 11 | 15 |
| 6  | 6  | 5  | 4  | 6  | 9  | 8  | 9  | 14 |
| 10 | 10 | 6  | 6  | 10 | 9  | 8  | 9  | 22 |
| 11 | 11 | 11 | 11 | 11 | 11 | 11 | 11 | 20 |
| 11 | 11 | 10 | 11 | 10 | 10 | 11 | 11 | 22 |
| 5  | 7  | 3  | 7  | 10 | 11 | 10 | 11 | 13 |
| 11 | 2  | 3  | 2  | 10 | 10 | 11 | 11 | 17 |
| 11 | 2  | 2  | 2  | 10 | 11 | 11 | 11 | 13 |
| 9  | 9  | 7  | 6  | 9  | 9  | 9  | 9  | 20 |
| 6  | 1  | 1  | 1  | 9  | 11 | 11 | 11 | 10 |
| 3  | 3  | 1  | 2  | 11 | 11 | 11 | 11 | 17 |
| 10 | 10 | 10 | 10 | 10 | 10 | 10 | 10 | 18 |
| 6  | 6  | 6  | 9  | 8  | 8  | 9  | 8  | 16 |
| 8  | 6  | 4  | 8  | 8  | 8  | 7  | 7  | 16 |
| 10 | 9  | 3  | 8  | 6  | 7  | 6  | 6  | 16 |
| 9  | 9  | 9  | 9  | 9  | 10 | 9  | 9  | 17 |
| 5  | 5  | 6  | 4  | 8  | 8  | 8  | 8  | 12 |
| 11 | 1  | 1  | 1  | 11 | 11 | 11 | 11 | 13 |
| 8  | 1  | 1  | 1  | 11 | 11 | 11 | 11 | 12 |
| 5  | 1  | 1  | 1  | 11 | 11 | 11 | 11 | 13 |
| 7  | 6  | 4  | 4  | 8  | 9  | 9  | 9  | 18 |
| 8  | 8  | 8  | 8  | 8  | 8  | 8  | 8  | 12 |
| 7  | 3  | 3  | 3  | 9  | 9  | 8  | 9  | 15 |
| 11 | 9  | 4  | 6  | 11 | 11 | 11 | 11 | 12 |
| 9  | 8  | 9  | 8  | 9  | 8  | 9  | 8  | 15 |
| 8  | 2  | 1  | 2  | 11 | 11 | 11 | 11 | 15 |
| 9  | 6  | 9  | 9  | 11 | 11 | 11 | 11 | 16 |
| 2  | 2  | 2  | 2  | 11 | 9  | 11 | 10 | 19 |
| 9  | 9  | 9  | 9  | 9  | 9  | 9  | 9  | 17 |
| 6  | 4  | 6  | 3  | 10 | 11 | 11 | 11 | 11 |
| 6  | 6  | 6  | 7  | 6  | 7  | 7  | 8  | 12 |
| 8  | 8  | 6  | 6  | 6  | 5  | 9  | 9  | 17 |
| 7  | 5  | 4  | 4  | 8  | 8  | 8  | 8  | 15 |
| 1  | 1  | 1  | 1  | 11 | 11 | 11 | 11 | 20 |
| 7  | 6  | 6  | 6  | 8  | 8  | 8  | 7  | 12 |
| 7  | 7  | 7  | 9  | 10 | 10 | 10 | 10 | 20 |
| 2  | 1  | 2  | 2  | 11 | 11 | 11 | 11 | 18 |
| 9  | 7  | 8  | 7  | 8  | 8  | 8  | 8  | 15 |
| 11 | 6  | 6  | 11 | 6  | 6  | 6  | 6  | 20 |
| 9  | 1  | 1  | 1  | 11 | 11 | 11 | 11 | 11 |
| 8  | 6  | 6  | 6  | 6  | 6  | 6  | 6  | 13 |
| 10 | 11 | 10 | 10 | 10 | 10 | 10 | 10 | 19 |
| 11 | 11 | 11 | 11 | 11 | 11 | 11 | 11 | 20 |
| 7  | 7  | 7  | 6  | 8  | 8  | 8  | 8  | 14 |
| 9  | 8  | 7  | 7  | 6  | 8  | 7  | 7  | 15 |
| 8  | 4  | 6  | 6  | 8  | 6  | 8  | 8  | 15 |
| 11 | 2  | 2  | 2  | 11 | 11 | 10 | 11 | 19 |
| 4  | 6  | 1  | 1  | 11 | 9  | 11 | 9  | 16 |

|    |    |    |    |    |    |    |    |    |
|----|----|----|----|----|----|----|----|----|
| 11 | 10 | 11 | 11 | 10 | 9  | 9  | 9  | 18 |
| 7  | 8  | 7  | 9  | 8  | 8  | 8  | 9  | 18 |
| 8  | 6  | 6  | 6  | 6  | 6  | 6  | 6  | 13 |
| 11 | 7  | 3  | 5  | 8  | 6  | 6  | 6  | 20 |
| 4  | 3  | 3  | 3  | 8  | 8  | 8  | 8  | 13 |
| 9  | 5  | 6  | 5  | 8  | 9  | 9  | 8  | 16 |
| 10 | 6  | 6  | 8  | 7  | 9  | 8  | 10 | 18 |
| 6  | 6  | 6  | 6  | 6  | 6  | 6  | 6  | 13 |
| 10 | 7  | 6  | 6  | 9  | 8  | 9  | 9  | 17 |
| 6  | 8  | 8  | 8  | 8  | 7  | 8  | 8  | 15 |
| 8  | 4  | 2  | 3  | 10 | 10 | 7  | 9  | 19 |
| 9  | 9  | 9  | 9  | 9  | 9  | 9  | 9  | 17 |
| 1  | 1  | 1  | 1  | 10 | 11 | 11 | 11 | 16 |
| 6  | 4  | 6  | 6  | 6  | 6  | 6  | 6  | 11 |
| 8  | 1  | 1  | 2  | 11 | 11 | 11 | 11 | 16 |
| 11 | 7  | 8  | 8  | 6  | 5  | 6  | 7  | 20 |
| 7  | 4  | 5  | 6  | 6  | 8  | 9  | 9  | 14 |
| 9  | 6  | 6  | 7  | 8  | 9  | 9  | 9  | 19 |
| 11 | 1  | 1  | 1  | 11 | 11 | 11 | 11 | 11 |
| 6  | 5  | 9  | 5  | 6  | 6  | 6  | 6  | 15 |
| 9  | 1  | 1  | 1  | 11 | 11 | 11 | 11 | 10 |
| 3  | 2  | 2  | 5  | 8  | 6  | 10 | 8  | 14 |
| 11 | 11 | 11 | 11 | 11 | 11 | 11 | 11 | 20 |
| 11 | 11 | 6  | 6  | 11 | 11 | 5  | 11 | 16 |
| 7  | 3  | 2  | 6  | 8  | 6  | 4  | 6  | 9  |
| 11 | 6  | 7  | 7  | 7  | 9  | 8  | 10 | 16 |
| 3  | 2  | 2  | 2  | 11 | 11 | 11 | 11 | 15 |
| 8  | 2  | 1  | 1  | 11 | 11 | 11 | 11 | 14 |
| 7  | 5  | 4  | 5  | 5  | 6  | 5  | 4  | 11 |
| 11 | 7  | 9  | 7  | 10 | 11 | 9  | 10 | 18 |
| 6  | 1  | 4  | 6  | 6  | 6  | 6  | 6  | 11 |
| 9  | 7  | 11 | 9  | 11 | 9  | 7  | 9  | 15 |
| 8  | 1  | 2  | 1  | 11 | 11 | 11 | 11 | 9  |
| 8  | 7  | 7  | 5  | 8  | 6  | 4  | 6  | 10 |
| 10 | 9  | 8  | 5  | 9  | 8  | 10 | 9  | 18 |
| 1  | 1  | 1  | 1  | 11 | 11 | 10 | 11 | 14 |
| 4  | 2  | 1  | 2  | 11 | 11 | 11 | 11 | 16 |
| 11 | 11 | 11 | 11 | 11 | 11 | 11 | 11 | 20 |
| 11 | 7  | 5  | 11 | 6  | 11 | 10 | 11 | 20 |
| 6  | 5  | 5  | 4  | 5  | 6  | 5  | 4  | 15 |
| 5  | 5  | 5  | 5  | 5  | 8  | 8  | 8  | 14 |

| physicalde<br>mand | temporalde<br>emand | effort | performance | frustration |
|--------------------|---------------------|--------|-------------|-------------|
| 15                 | 16                  | 17     | 19          | 5           |
| 15                 | 14                  | 14     | 14          | 14          |
| 20                 | 9                   | 19     | 13          | 16          |
| 20                 | 13                  | 17     | 1           | 2           |
| 20                 | 16                  | 20     | 2           | 13          |
| 20                 | 13                  | 19     | 7           | 11          |
| 20                 | 16                  | 16     | 17          | 9           |
| 18                 | 16                  | 20     | 3           | 0           |
| 20                 | 20                  | 20     | 20          | 20          |
| 15                 | 12                  | 12     | 14          | 11          |
| 17                 | 15                  | 16     | 17          | 14          |
| 19                 | 15                  | 18     | 16          | 14          |
| 11                 | 11                  | 11     | 11          | 11          |
| 12                 | 10                  | 14     | 12          | 10          |
| 20                 | 20                  | 20     | 17          | 14          |
| 19                 | 17                  | 17     | 18          | 15          |
| 20                 | 20                  | 20     | 17          | 11          |
| 15                 | 18                  | 15     | 19          | 7           |
| 13                 | 10                  | 10     | 2           | 3           |
| 15                 | 12                  | 16     | 14          | 12          |
| 20                 | 12                  | 18     | 14          | 4           |
| 20                 | 17                  | 19     | 17          | 19          |
| 18                 | 14                  | 13     | 17          | 11          |
| 17                 | 17                  | 17     | 16          | 17          |
| 18                 | 12                  | 17     | 15          | 16          |
| 20                 | 20                  | 20     | 20          | 20          |
| 18                 | 20                  | 18     | 19          | 14          |
| 11                 | 14                  | 10     | 14          | 13          |
| 15                 | 19                  | 15     | 18          | 17          |
| 19                 | 19                  | 18     | 1           | 8           |
| 13                 | 18                  | 16     | 20          | 5           |
| 18                 | 19                  | 18     | 17          | 11          |
| 13                 | 15                  | 15     | 9           | 10          |
| 9                  | 12                  | 14     | 9           | 12          |
| 13                 | 12                  | 12     | 2           | 1           |
| 20                 | 15                  | 20     | 1           | 4           |
| 16                 | 11                  | 16     | 16          | 15          |
| 12                 | 8                   | 12     | 11          | 10          |
| 20                 | 15                  | 14     | 14          | 14          |
| 20                 | 15                  | 17     | 12          | 13          |
| 20                 | 20                  | 19     | 12          | 13          |
| 12                 | 10                  | 14     | 10          | 11          |
| 20                 | 11                  | 10     | 13          | 13          |
| 15                 | 17                  | 14     | 15          | 18          |
| 20                 | 16                  | 14     | 14          | 8           |
| 15                 | 11                  | 15     | 1           | 1           |
| 20                 | 20                  | 19     | 15          | 19          |
| 20                 | 20                  | 19     | 19          | 20          |
| 9                  | 7                   | 19     | 7           | 15          |
| 14                 | 14                  | 19     | 1           | 5           |

|    |    |    |    |    |
|----|----|----|----|----|
| 16 | 11 | 19 | 1  | 2  |
| 18 | 18 | 15 | 15 | 2  |
| 15 | 10 | 18 | 1  | 3  |
| 15 | 10 | 19 | 1  | 2  |
| 16 | 16 | 13 | 20 | 5  |
| 17 | 15 | 17 | 13 | 16 |
| 20 | 15 | 15 | 15 | 11 |
| 14 | 17 | 14 | 7  | 7  |
| 19 | 19 | 20 | 6  | 9  |
| 20 | 18 | 20 | 15 | 12 |
| 15 | 19 | 15 | 19 | 17 |
| 17 | 13 | 14 | 14 | 15 |
| 19 | 20 | 12 | 4  | 17 |
| 18 | 17 | 17 | 11 | 15 |
| 15 | 19 | 19 | 16 | 19 |
| 16 | 12 | 20 | 1  | 12 |
| 19 | 15 | 17 | 12 | 13 |
| 16 | 15 | 14 | 15 | 15 |
| 20 | 15 | 15 | 8  | 8  |
| 20 | 17 | 15 | 11 | 13 |
| 17 | 20 | 18 | 17 | 11 |
| 18 | 20 | 18 | 17 | 13 |
| 20 | 20 | 20 | 1  | 14 |
| 12 | 8  | 11 | 11 | 11 |
| 20 | 9  | 12 | 14 | 13 |
| 18 | 17 | 14 | 18 | 16 |
| 19 | 14 | 14 | 15 | 16 |
| 15 | 17 | 19 | 4  | 16 |
| 17 | 17 | 16 | 16 | 17 |
| 14 | 20 | 21 | 4  | 4  |
| 13 | 15 | 17 | 2  | 7  |
| 16 | 11 | 15 | 13 | 13 |
| 18 | 17 | 18 | 3  | 1  |
| 13 | 13 | 13 | 3  | 1  |
| 13 | 12 | 14 | 13 | 13 |
| 15 | 14 | 15 | 14 | 20 |
| 11 | 16 | 17 | 14 | 16 |
| 16 | 14 | 15 | 12 | 16 |
| 20 | 20 | 12 | 15 | 18 |
| 18 | 17 | 18 | 2  | 2  |
| 13 | 15 | 15 | 12 | 15 |
| 15 | 15 | 16 | 13 | 12 |
| 15 | 17 | 19 | -1 | 2  |
| 15 | 16 | 17 | 14 | 17 |
| 15 | 15 | 16 | 13 | 12 |
| 13 | 12 | 13 | 9  | 13 |
| 15 | 17 | 19 | 4  | 16 |
| 12 | 15 | 13 | 4  | 1  |
| 20 | 20 | 20 | 13 | 15 |
| 18 | 18 | 15 | 16 | 16 |
| 16 | 16 | 16 | 6  | 15 |
| 19 | 12 | 12 | 14 | 13 |
| 20 | 17 | 13 | 1  | 6  |
| 20 | 20 | 20 | 17 | 11 |

|    |    |    |    |    |
|----|----|----|----|----|
| 17 | 14 | 15 | 17 | 13 |
| 20 | 20 | 16 | 13 | 11 |
| 16 | 20 | 16 | 20 | 17 |
| 18 | 13 | 18 | 13 | 15 |
| 18 | 16 | 14 | 16 | 13 |
| 20 | 19 | 17 | 8  | 6  |
| 20 | 19 | 19 | 20 | 16 |
| 11 | 14 | 12 | 11 | 11 |
| 13 | 13 | 13 | 13 | 13 |
| 13 | 11 | 11 | 13 | 9  |
| 20 | 19 | 18 | 13 | 11 |
| 20 | 16 | 17 | 14 | 13 |
| 13 | 11 | 11 | 13 | 9  |
| 20 | 17 | 18 | 4  | 0  |
| 19 | 3  | 19 | 13 | 13 |
| 14 | 18 | 14 | 8  | 15 |
| 19 | 20 | 20 | 3  | 11 |
| 20 | 9  | 18 | 13 | 15 |
| 15 | 16 | 17 | 1  | 4  |
| 17 | 15 | 18 | 14 | 16 |
| 20 | 14 | 16 | 15 | 16 |
| 15 | 16 | 16 | 13 | 17 |
| 17 | 16 | 14 | 3  | 4  |
| 20 | 19 | 17 | 3  | 6  |
| 17 | 15 | 14 | 15 | 19 |
| 12 | 14 | 12 | 1  | 10 |
| 19 | 15 | 19 | 16 | 18 |
| 19 | 16 | 16 | 17 | 20 |
| 17 | 15 | 14 | 2  | 5  |
| 18 | 14 | 15 | 17 | 9  |
| 18 | 17 | 17 | 17 | 16 |
| 14 | 17 | 17 | 13 | 17 |
| 18 | 17 | 16 | 14 | 19 |
| 15 | 14 | 11 | 7  | 1  |
| 17 | 20 | 20 | 7  | 4  |
| 17 | 14 | 15 | 14 | 9  |
| 13 | 13 | 13 | 12 | 14 |
| 10 | 11 | 11 | 14 | 12 |
| 18 | 19 | 19 | 17 | 11 |
| 16 | 16 | 20 | 3  | 2  |
| 9  | 12 | 10 | 13 | 11 |
| 17 | 20 | 20 | 7  | 4  |
| 18 | 15 | 15 | 15 | 2  |
| 12 | 15 | 12 | 9  | 11 |
| 19 | 20 | 19 | 17 | 12 |
| 17 | 14 | 12 | 17 | 16 |
| 17 | 17 | 17 | 13 | 13 |
| 18 | 19 | 19 | 15 | 13 |
| 18 | 20 | 19 | 19 | 20 |
| 12 | 15 | 15 | 19 | 16 |
| 16 | 15 | 12 | 20 | 5  |
| 18 | 15 | 19 | 5  | 13 |
| 18 | 15 | 15 | 16 | 12 |
| 14 | 17 | 10 | 14 | 10 |

|    |    |    |    |    |
|----|----|----|----|----|
| 18 | 17 | 16 | 3  | 5  |
| 18 | 15 | 14 | 18 | 16 |
| 18 | 17 | 11 | 3  | 4  |
| 13 | 13 | 16 | 17 | 16 |
| 18 | 18 | 12 | 4  | 6  |
| 13 | 14 | 13 | 17 | 15 |
| 14 | 15 | 16 | 3  | 1  |
| 18 | 15 | 8  | 17 | 8  |
| 18 | 14 | 14 | 17 | 14 |
| 20 | 20 | 20 | 20 | 20 |
| 18 | 19 | 18 | 22 | 20 |
| 16 | 16 | 12 | 18 | 12 |
| 13 | 10 | 14 | 3  | 1  |
| 11 | 11 | 11 | 4  | 1  |
| 20 | 15 | 15 | 15 | 14 |
| 16 | 15 | 16 | 5  | 7  |
| 20 | 18 | 18 | 2  | 15 |
| 18 | 18 | 18 | 18 | 17 |
| 16 | 16 | 14 | 14 | 15 |
| 20 | 20 | 20 | 15 | 14 |
| 19 | 18 | 17 | 6  | 8  |
| 18 | 17 | 18 | 7  | 16 |
| 20 | 13 | 12 | 15 | 8  |
| 16 | 13 | 20 | 1  | 1  |
| 15 | 12 | 20 | 1  | 1  |
| 15 | 12 | 20 | 1  | 1  |
| 20 | 16 | 17 | 14 | 16 |
| 12 | 12 | 13 | 12 | 12 |
| 15 | 14 | 15 | 15 | 15 |
| 20 | 20 | 12 | 2  | 6  |
| 15 | 15 | 16 | 15 | 16 |
| 20 | 15 | 15 | 1  | 4  |
| 20 | 15 | 16 | 16 | 16 |
| 14 | 16 | 17 | 1  | 7  |
| 20 | 18 | 18 | 18 | 18 |
| 20 | 11 | 20 | 11 | 15 |
| 13 | 12 | 12 | 12 | 13 |
| 19 | 20 | 15 | 11 | 13 |
| 18 | 16 | 17 | 12 | 15 |
| 20 | 15 | 20 | 1  | 1  |
| 16 | 15 | 14 | 12 | 10 |
| 20 | 15 | 19 | 3  | 13 |
| 18 | 14 | 15 | 18 | 5  |
| 14 | 16 | 16 | 17 | 16 |
| 20 | 20 | 20 | 16 | 20 |
| 20 | 20 | 20 | 13 | 13 |
| 20 | 20 | 20 | 13 | 13 |
| 18 | 19 | 18 | 19 | 19 |
| 20 | 20 | 20 | 20 | 20 |
| 20 | 14 | 16 | 14 | 6  |
| 19 | 18 | 18 | 11 | 13 |
| 19 | 19 | 19 | 15 | 11 |
| 19 | 19 | 20 | 3  | 12 |
| 15 | 15 | 12 | 7  | 1  |



|    |    |    |    |    |
|----|----|----|----|----|
| 20 | 2  | 20 | 13 | 13 |
| 18 | 16 | 16 | 17 | 17 |
| 19 | 14 | 14 | 15 | 16 |
| 20 | 20 | 20 | 15 | 12 |
| 14 | 14 | 15 | 7  | 11 |
| 18 | 14 | 15 | 14 | 9  |
| 20 | 11 | 17 | 13 | 18 |
| 13 | 13 | 13 | 13 | 13 |
| 9  | 9  | 17 | 7  | 17 |
| 20 | 20 | 19 | 17 | 18 |
| 19 | 12 | 12 | 14 | 13 |
| 17 | 17 | 17 | 17 | 17 |
| 20 | 16 | 17 | 13 | 2  |
| 11 | 11 | 11 | 11 | 11 |
| 18 | 18 | 20 | 1  | 2  |
| 20 | 20 | 20 | 17 | 19 |
| 18 | 15 | 10 | 12 | 11 |
| 9  | 7  | 19 | 7  | 15 |
| 16 | 15 | 18 | 1  | 3  |
| 20 | 20 | 20 | 15 | 11 |
| 15 | 14 | 18 | 1  | 3  |
| 11 | 14 | 16 | 4  | 11 |
| 20 | 20 | 20 | 20 | 20 |
| 18 | 19 | 15 | 17 | 18 |
| 12 | 14 | 10 | 12 | 14 |
| 20 | 13 | 15 | 13 | 20 |
| 20 | 20 | 16 | 2  | 17 |
| 18 | 20 | 18 | 1  | 4  |
| 13 | 15 | 11 | 13 | 15 |
| 20 | 17 | 17 | 3  | 15 |
| 12 | 12 | 12 | 12 | 12 |
| 20 | 20 | 16 | 18 | 20 |
| 13 | 14 | 10 | 2  | 3  |
| 15 | 16 | 12 | 14 | 16 |
| 20 | 15 | 17 | 17 | 12 |
| 20 | 18 | 15 | 13 | 4  |
| 18 | 16 | 13 | 18 | 7  |
| 20 | 20 | 20 | 20 | 20 |
| 18 | 15 | 19 | 17 | 14 |
| 13 | 11 | 15 | 13 | 11 |
| 20 | 11 | 14 | 15 | 6  |
